# Supplementary material for: Formation of 5-Aminomethyl-2,3-dihydropyridine-4(1H)-ones from 4-Amino-tetrahydropyridinylidene Salts
Source: MDPI journal article supplement (doi:10.3390/molecules28196869), 2023-09-29
Supplement: s1 [file s1]

## Supplementary Information

# Formation of 5-Aminomethyl-2,3-Dihydropyridine-4(1H)- Ones from 4-Amino-Tetrahydropyridinylidene Salts

Werner Seebacher <sup>1,\*</sup>, Michael Hoffelner <sup>1</sup>, Ferdinand Belaj <sup>2</sup>, Teresa Pirker <sup>3</sup>, Muaaz Alajlani <sup>4</sup>, Rudolf Bauer <sup>3</sup>,  
Eva-Maria Pferschy-Wenzig <sup>3</sup>, Robert Saf <sup>5</sup> and Robert Weis <sup>1</sup>

<sup>1</sup> Pharmaceutical Chemistry, Institute of Pharmaceutical Sciences, University of Graz, Schubertstrasse 1, 8010 Graz, Austria; michael.hoffelner@uni-graz.at (M.H.); robert.weis@uni-graz.at (R.W.)

<sup>2</sup> Institute of Chemistry, University of Graz, Schubertstrasse 1, 8010 Graz, Austria; ferdinand.belaj@uni-graz.at

<sup>3</sup> Pharmacognosy, Institute for Pharmaceutical Sciences, University of Graz, Beethovenstrasse 8, 8010 Graz, Austria; teresa.pirker@uni-graz.at (T.P.); rudolf.bauer@uni-graz.at (R.B.); eva-maria.wenzig@uni-graz.at (E.-M.P.-W.)

<sup>4</sup> Faculty of Pharmacy, Al-Sham Private University, Tal, 011 Damascus, Syria; muaaz.alajlani.foph@aspu.edu.sy

<sup>5</sup> Institute for Chemistry and Technology of Materials (ICTM), Graz University of Technology, Stremayrgasse 9, 8010 Graz, Austria; robert.saf@tugraz.at

\* Correspondence: we.seebacher@uni-graz.at; Tel.: +43-316-380-5383; Fax: +43-316-380-9846

**Abstract:** 4-amino-tetrahydropyridinylidene salts and especially their N-alkyl-aryl derivatives show antiprotozoal potencies. Therefore, we tried an aldol reaction using the salts and aryl aldehydes in basic milieu. Instead of the awaited aldol products, an additional migration of the amine residue from position 4 to 5 was observed which formed together with the aldehyde dihydropyridine-4(1H)-ones bearing an amino aryl- moiety in position 5. The new compounds were investigated for their antiprotozoal, anticancer and antibacterial properties.

- 
1. NMR and MS spectra of compounds **2a—12**.....Figures **S1-S21**
  2. Crystal data of **6a**..... .Tables 1-7

**Figure S1.**  $^1\text{H}$  NMR at 400 MHz, NOE's,  $^{13}\text{C}$  NMR at 100 MHz spectra, HMBC and MS spectra for compound **2a**

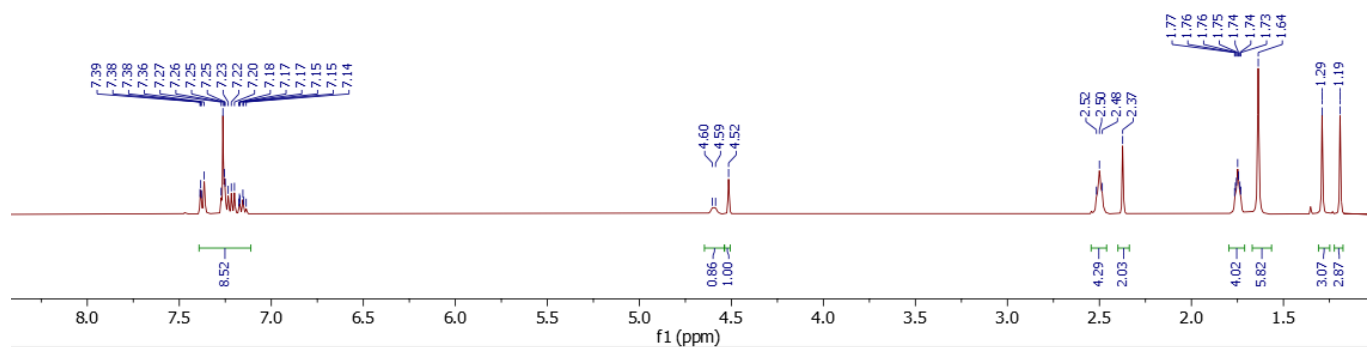

NOE from 1-H to 6-H and  $\text{CH}_3$

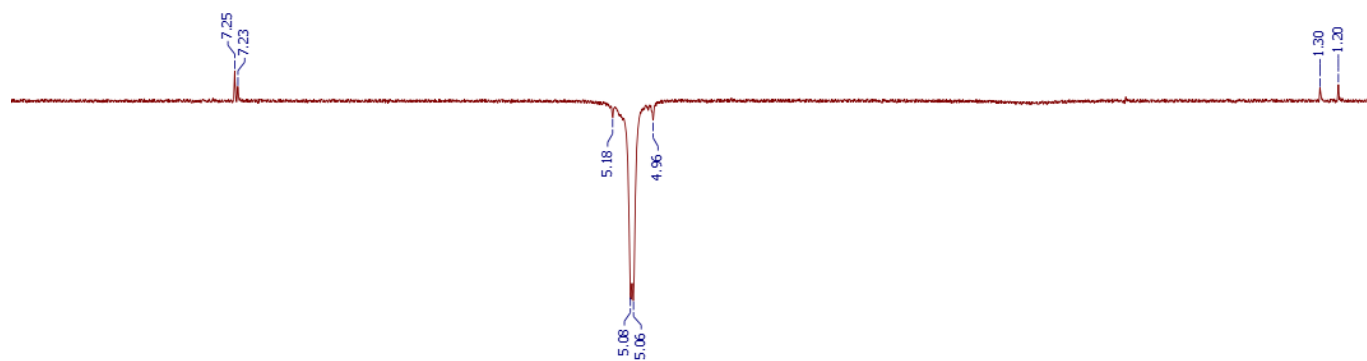

NOE from  $\text{NCH}_2$  to 1'-H and to ArH

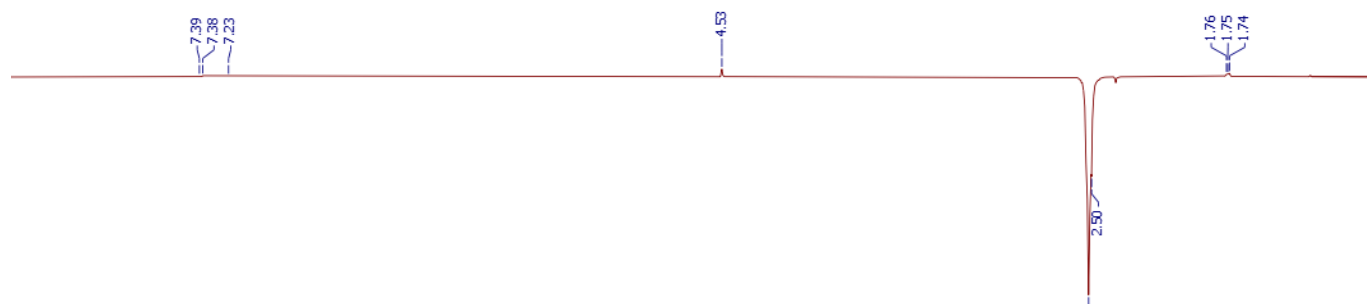

NOE from 3-H to  $\text{CH}_3$

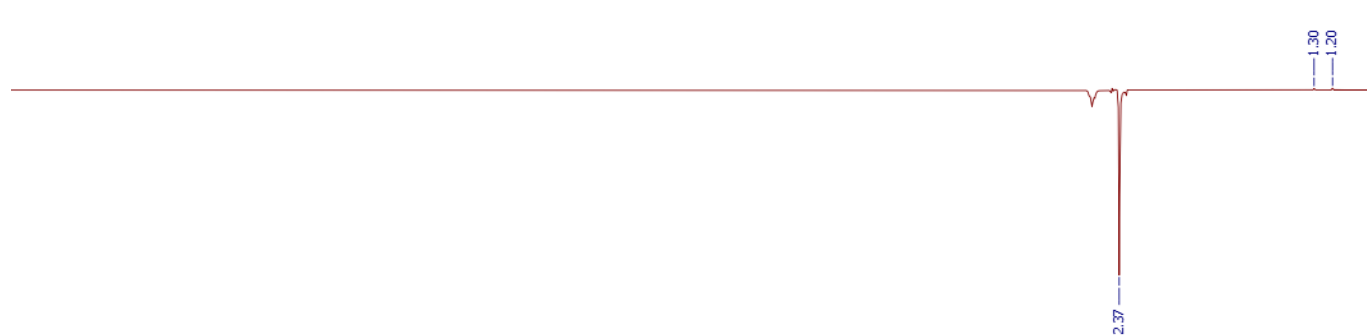

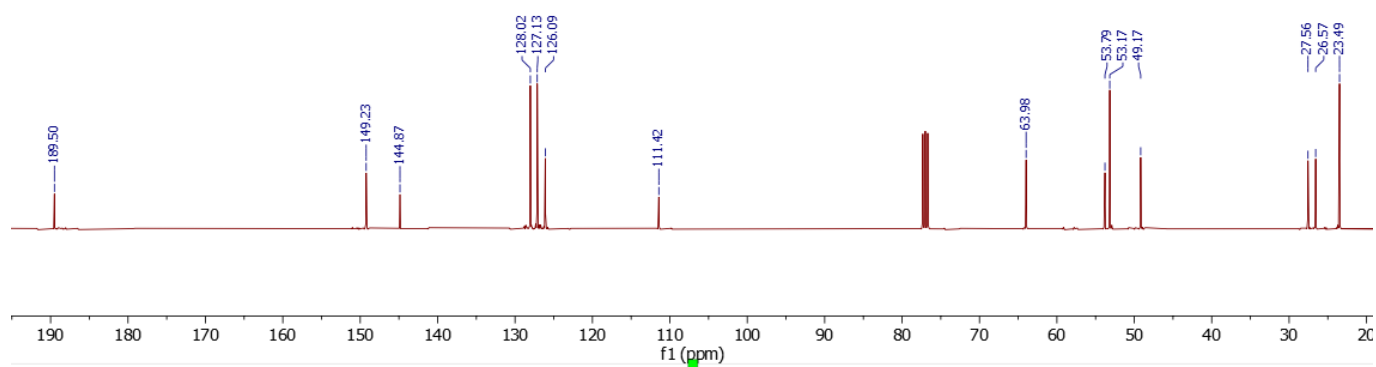

Cross-peak between C-4 and H-1' in HMBC spectra:

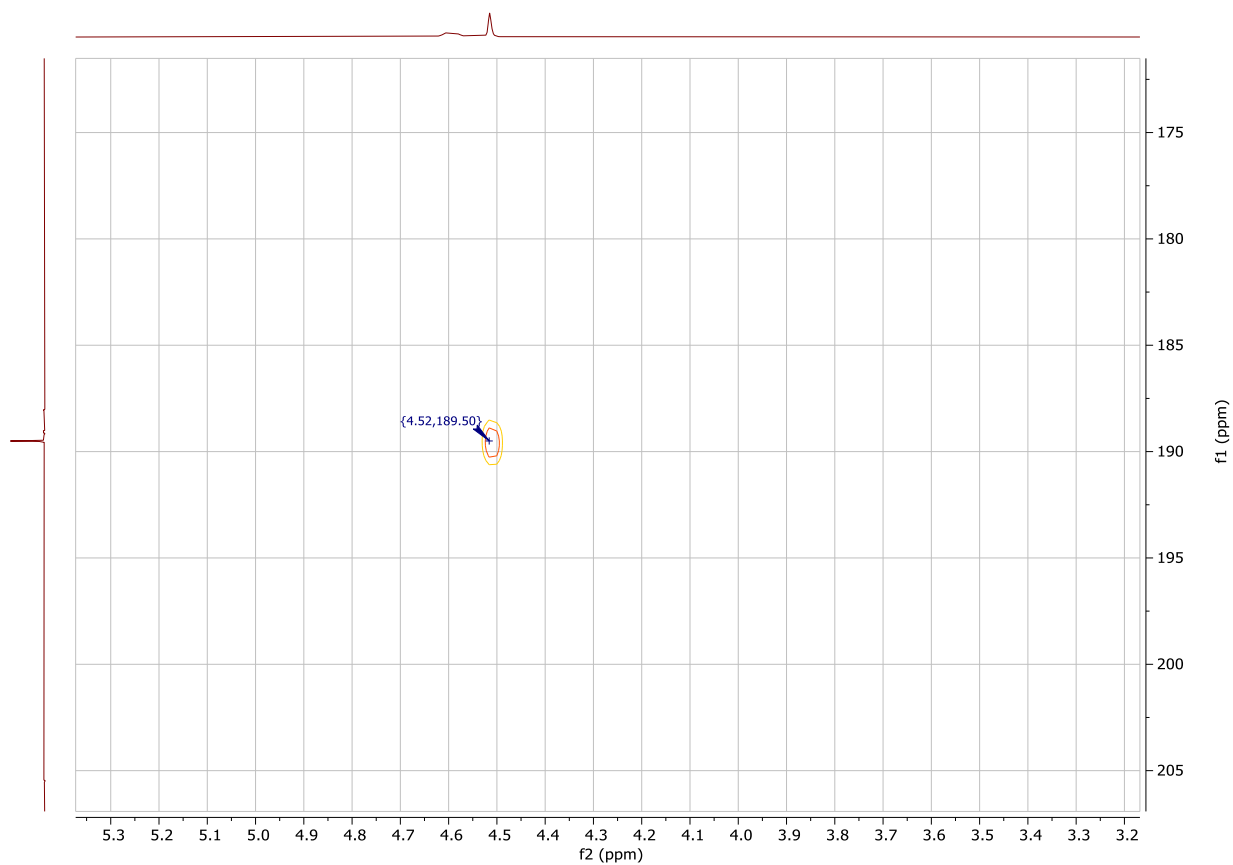

Cross-peak between C-5 and H-1' in HMBC spectra

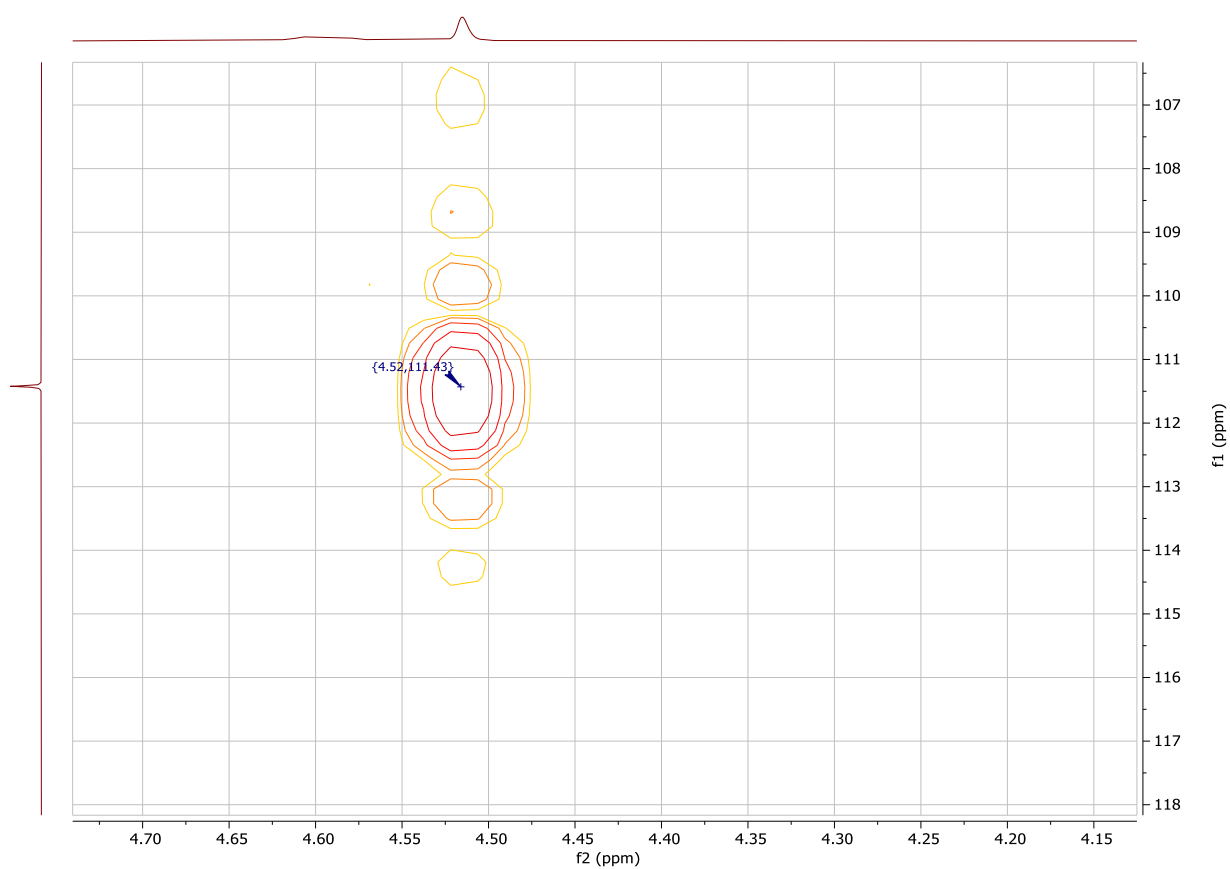

Cross-peak between  $\text{NCH}_2$  and 1'-H in HMBC spectra

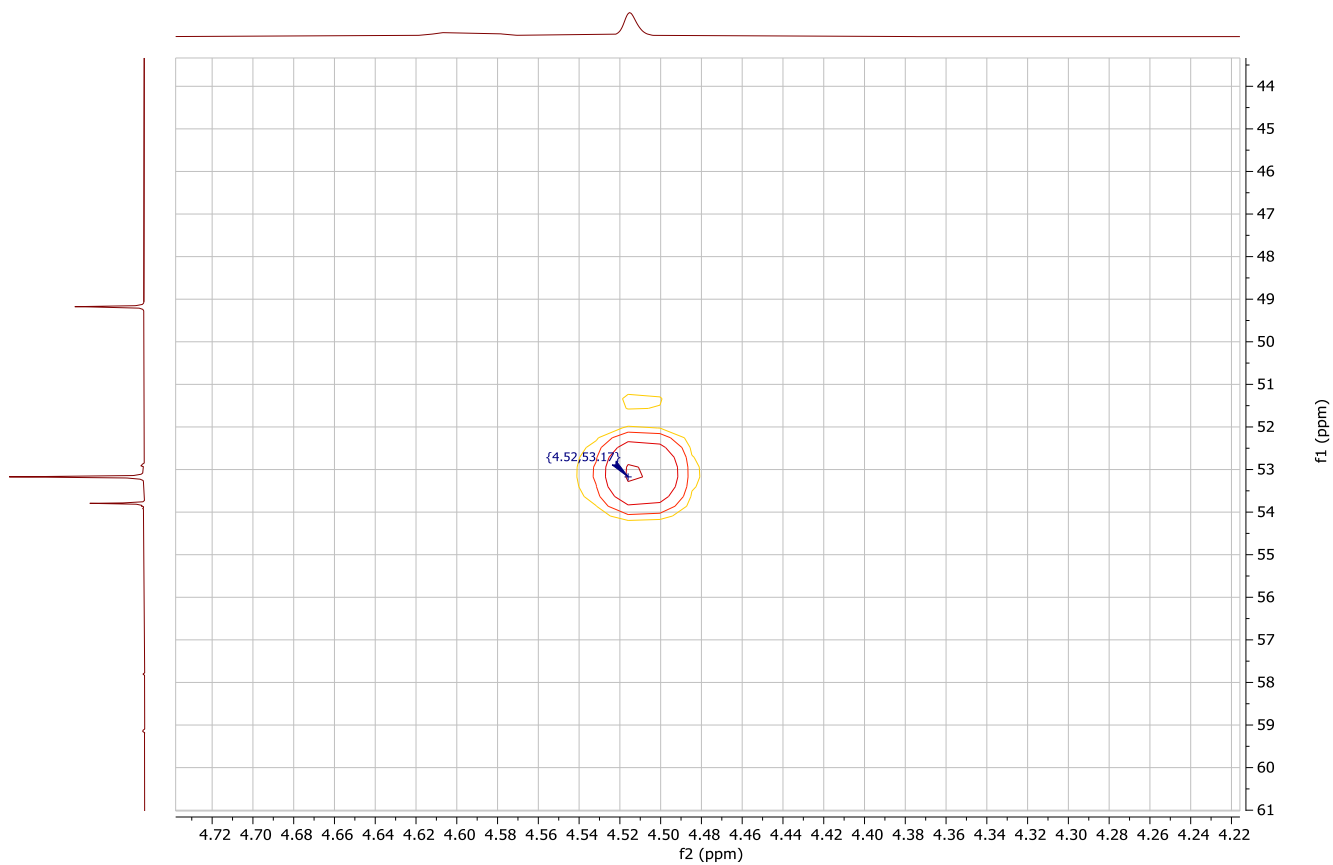

**Sample:** HMD95

**Ionisation:** DI-EI

Seebacher\_HMD95 138 (2.300) Cm (122-138-86:83)

TOF MS EI+  
4.79e4

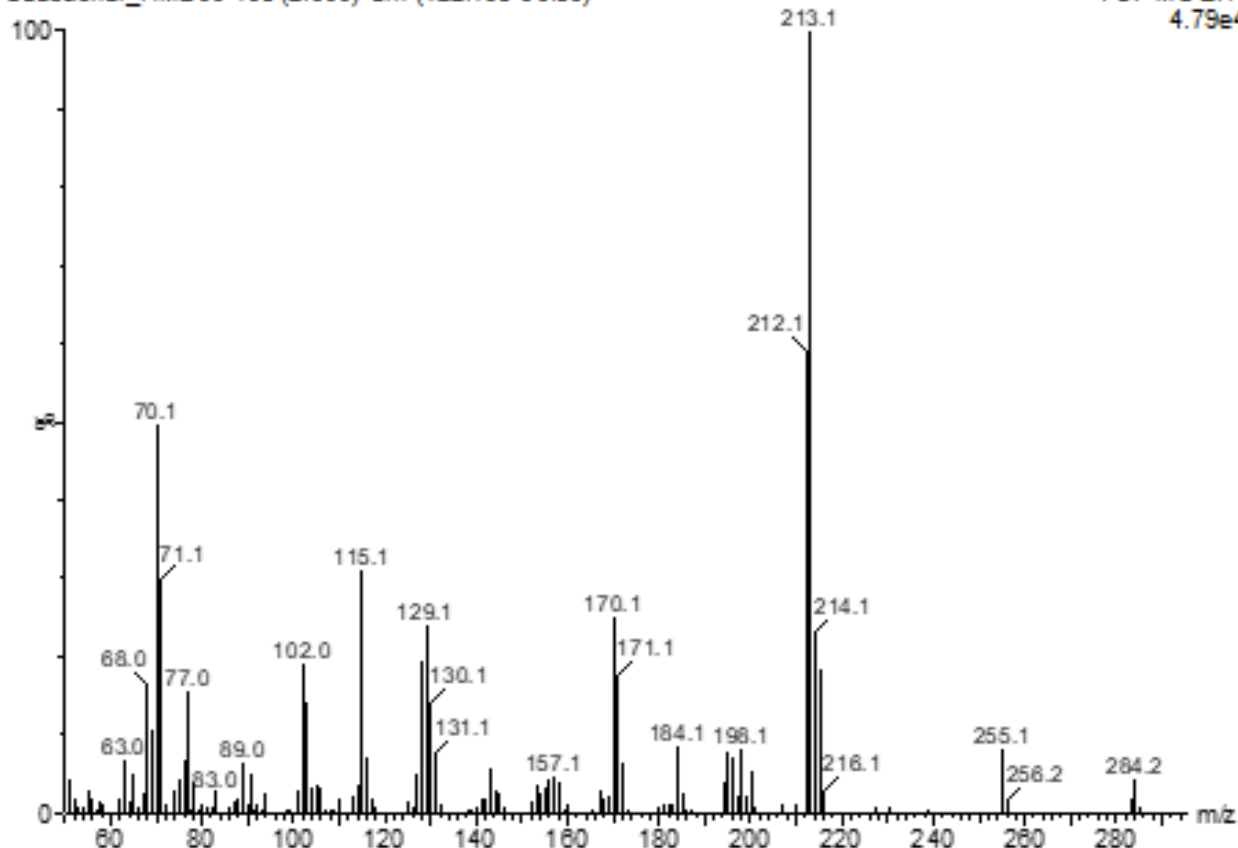

Seebacher\_HMD95 (0.017) Is (0.05,0.01) C<sub>18</sub>H<sub>24</sub>N<sub>2</sub>O

TOF MS EI+  
8.09e12

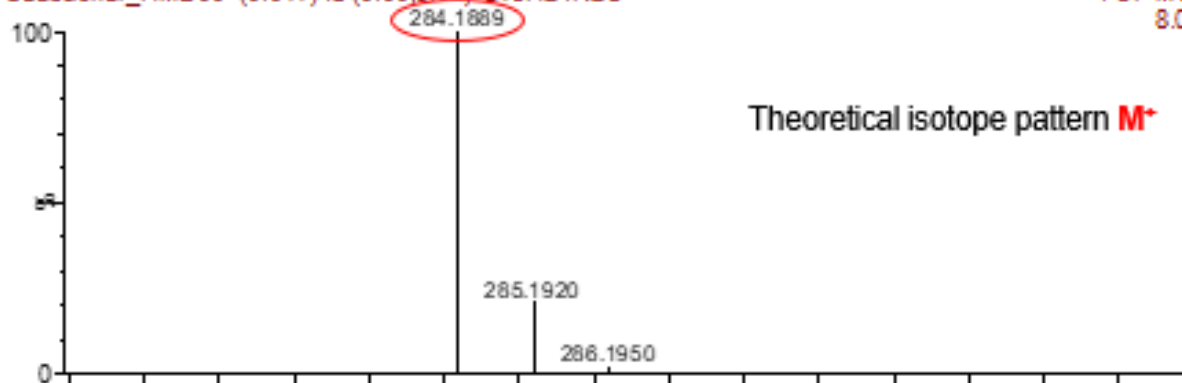

Seebacher\_HMD95 138 (2.300) Cm (122-138-86:83)

TOF MS EI+  
2.12e3

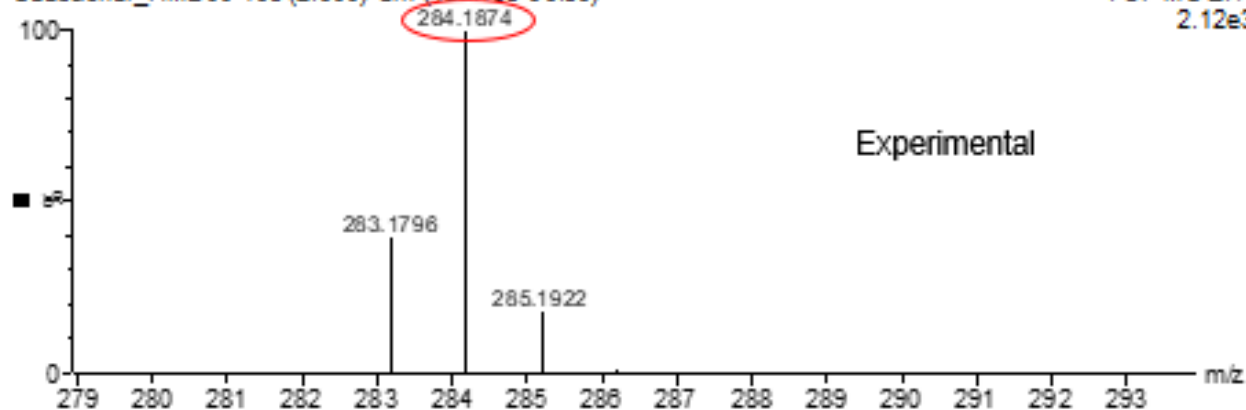

**Figure S2.**  $^1\text{H}$  NMR at 400 MHz,  $^{13}\text{C}$  NMR at 100 MHz spectra, and MS spectra for compound **2b**

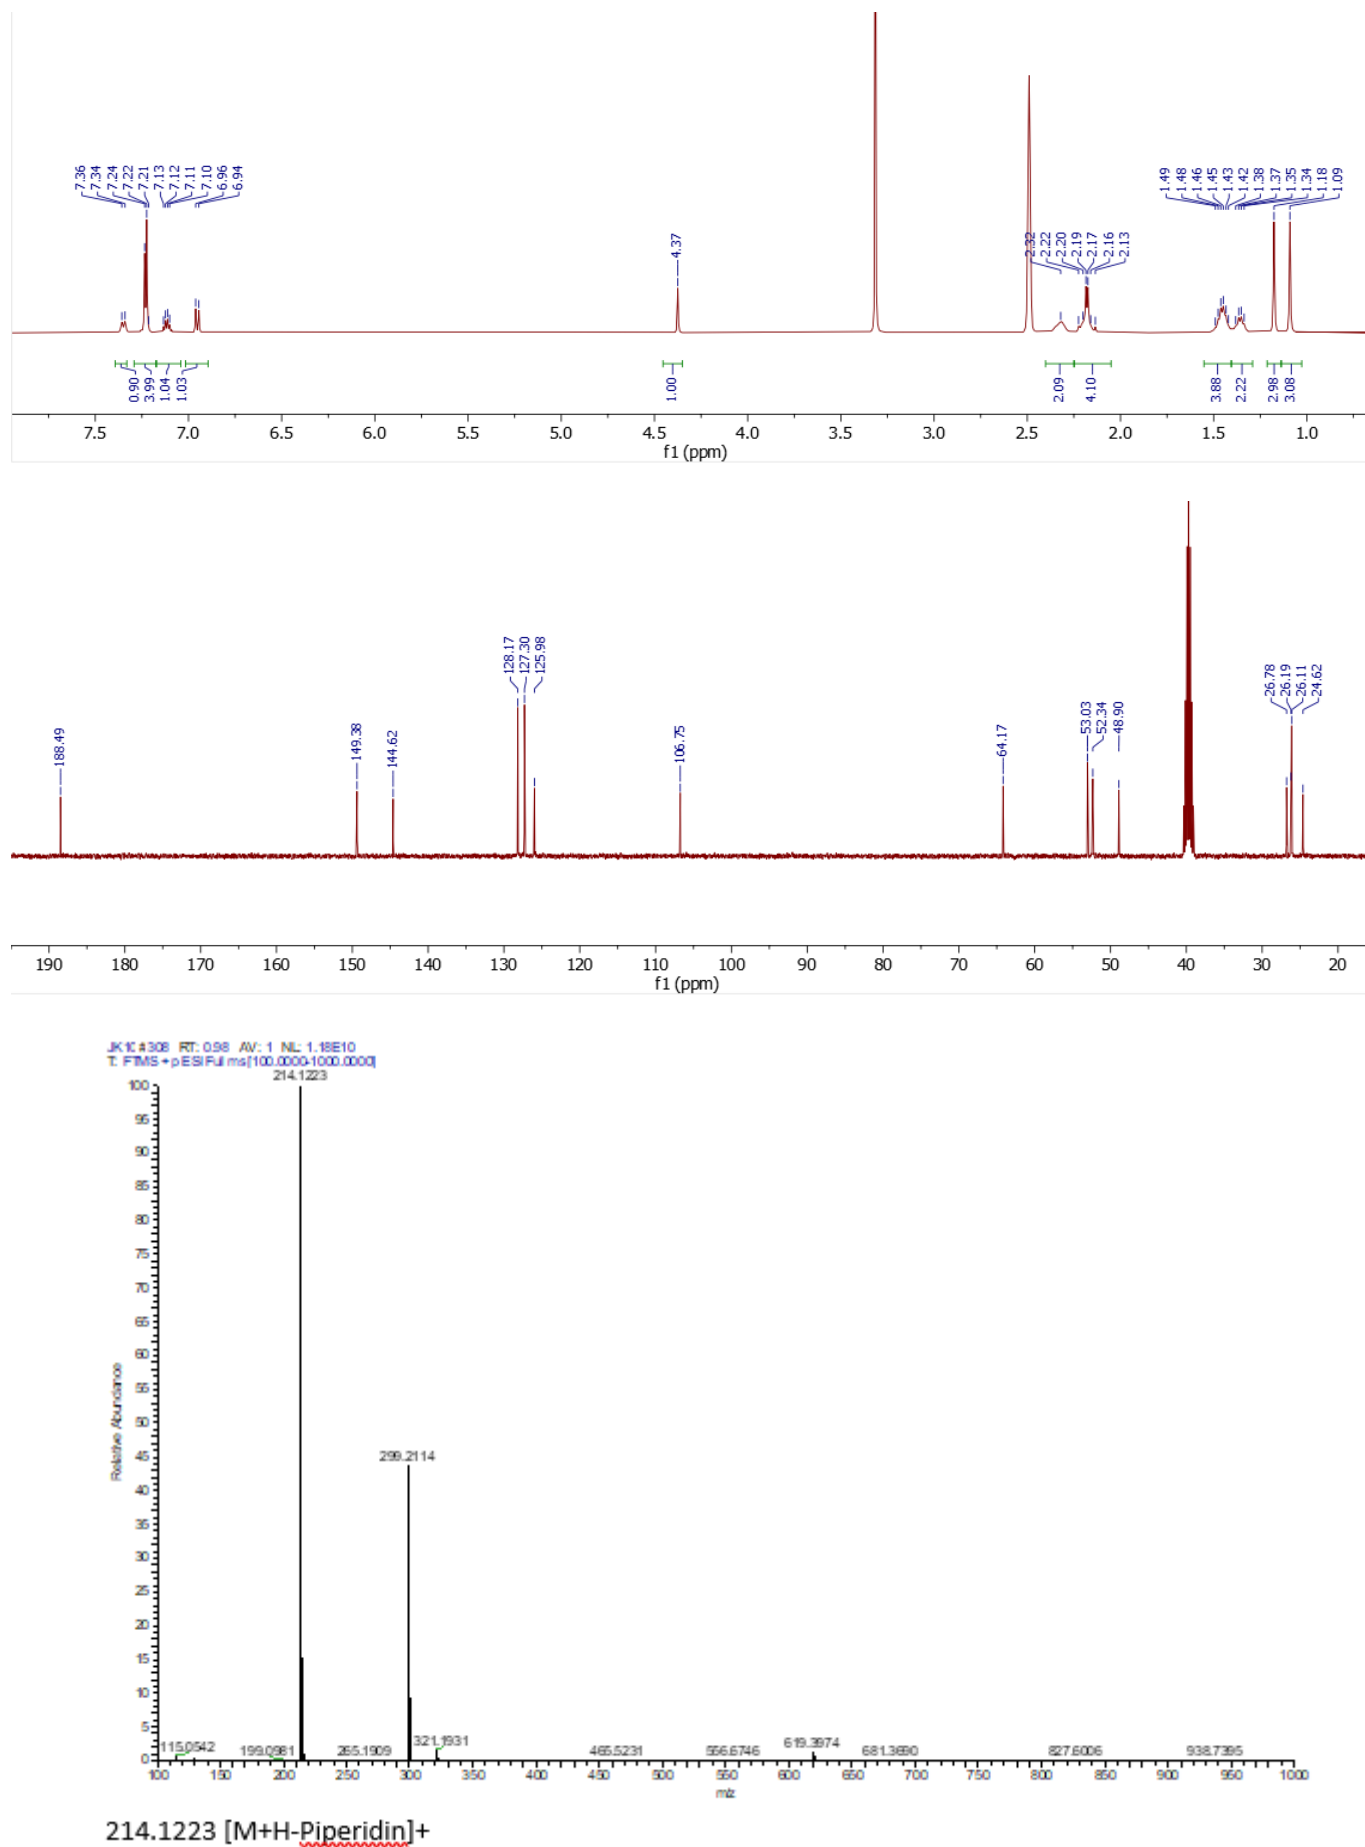

**Figure S3.**  $^1\text{H}$  NMR at 400 MHz,  $^{13}\text{C}$  NMR at 100 MHz spectra, and MS spectra for compound **2c**

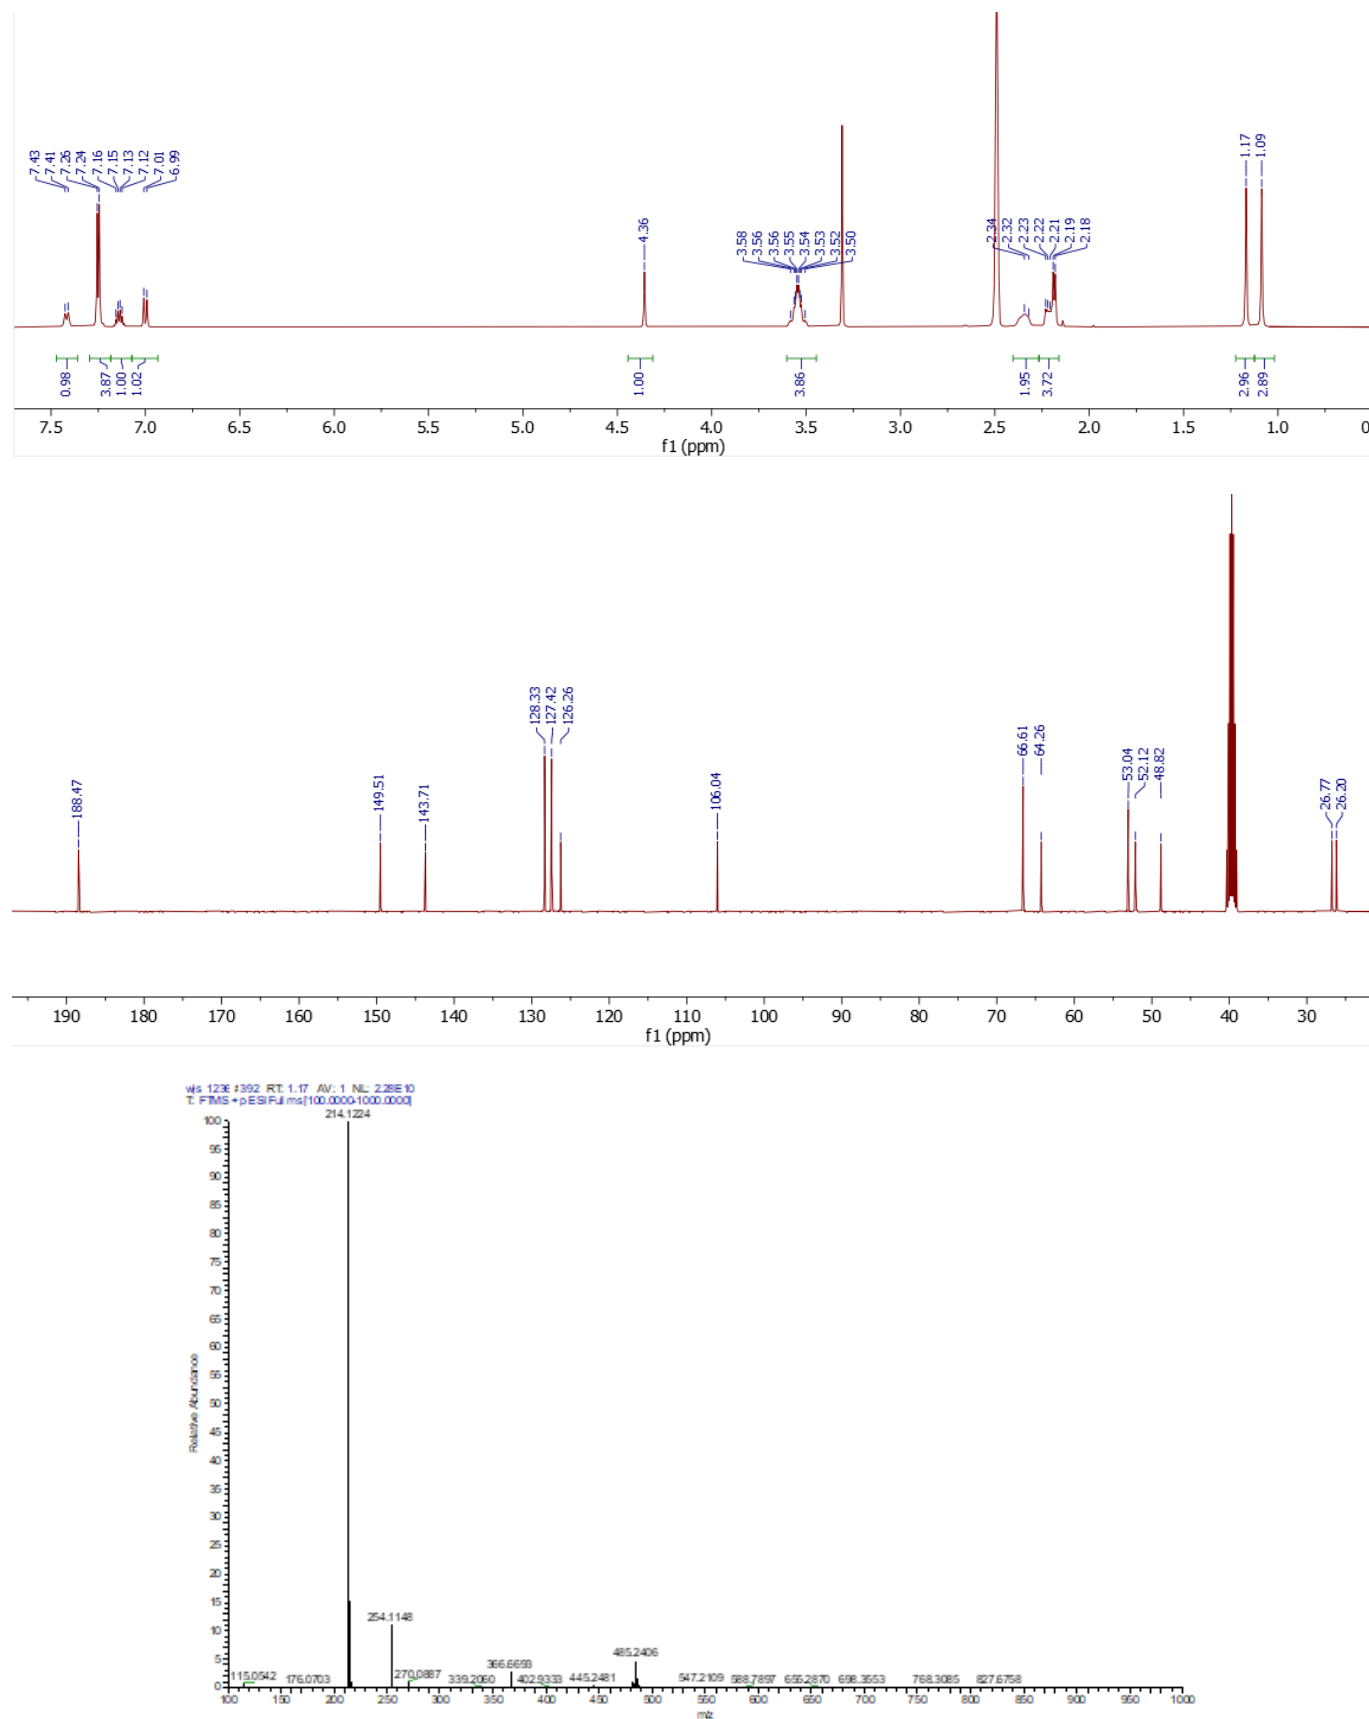

214.1224 =  $\text{M}+\text{H}-\text{C}_4\text{H}_9\text{ON}$

**Figure S4.**  $^1\text{H}$  NMR at 400 MHz,  $^{13}\text{C}$  NMR at 100 MHz spectra, and MS spectra for compound **2d**

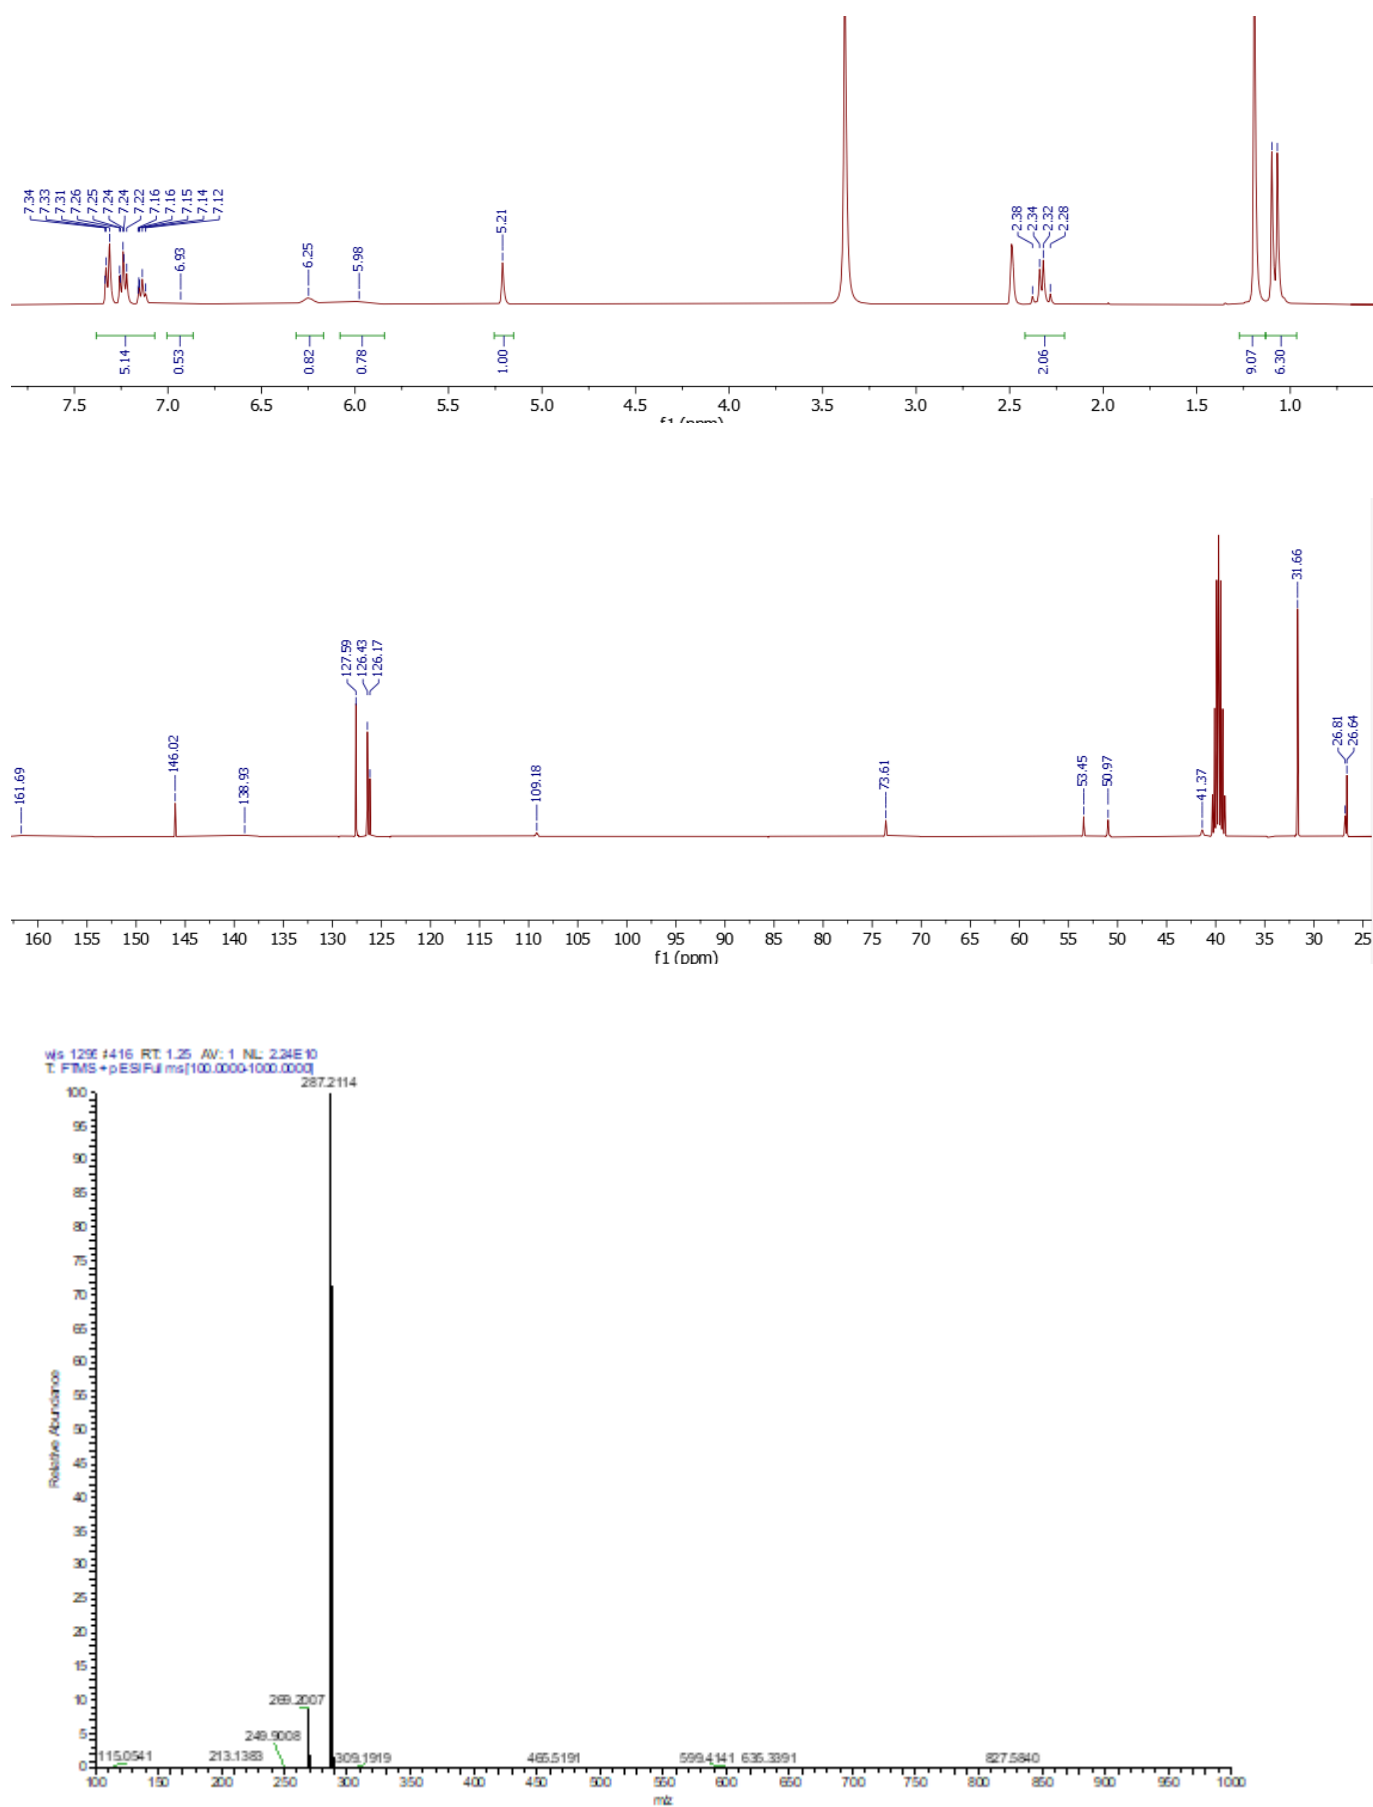



**Figure S5.**  $^1\text{H}$  NMR at 400 MHz,  $^{13}\text{C}$  NMR at 100 MHz spectra, and MS spectra for compound **3a**

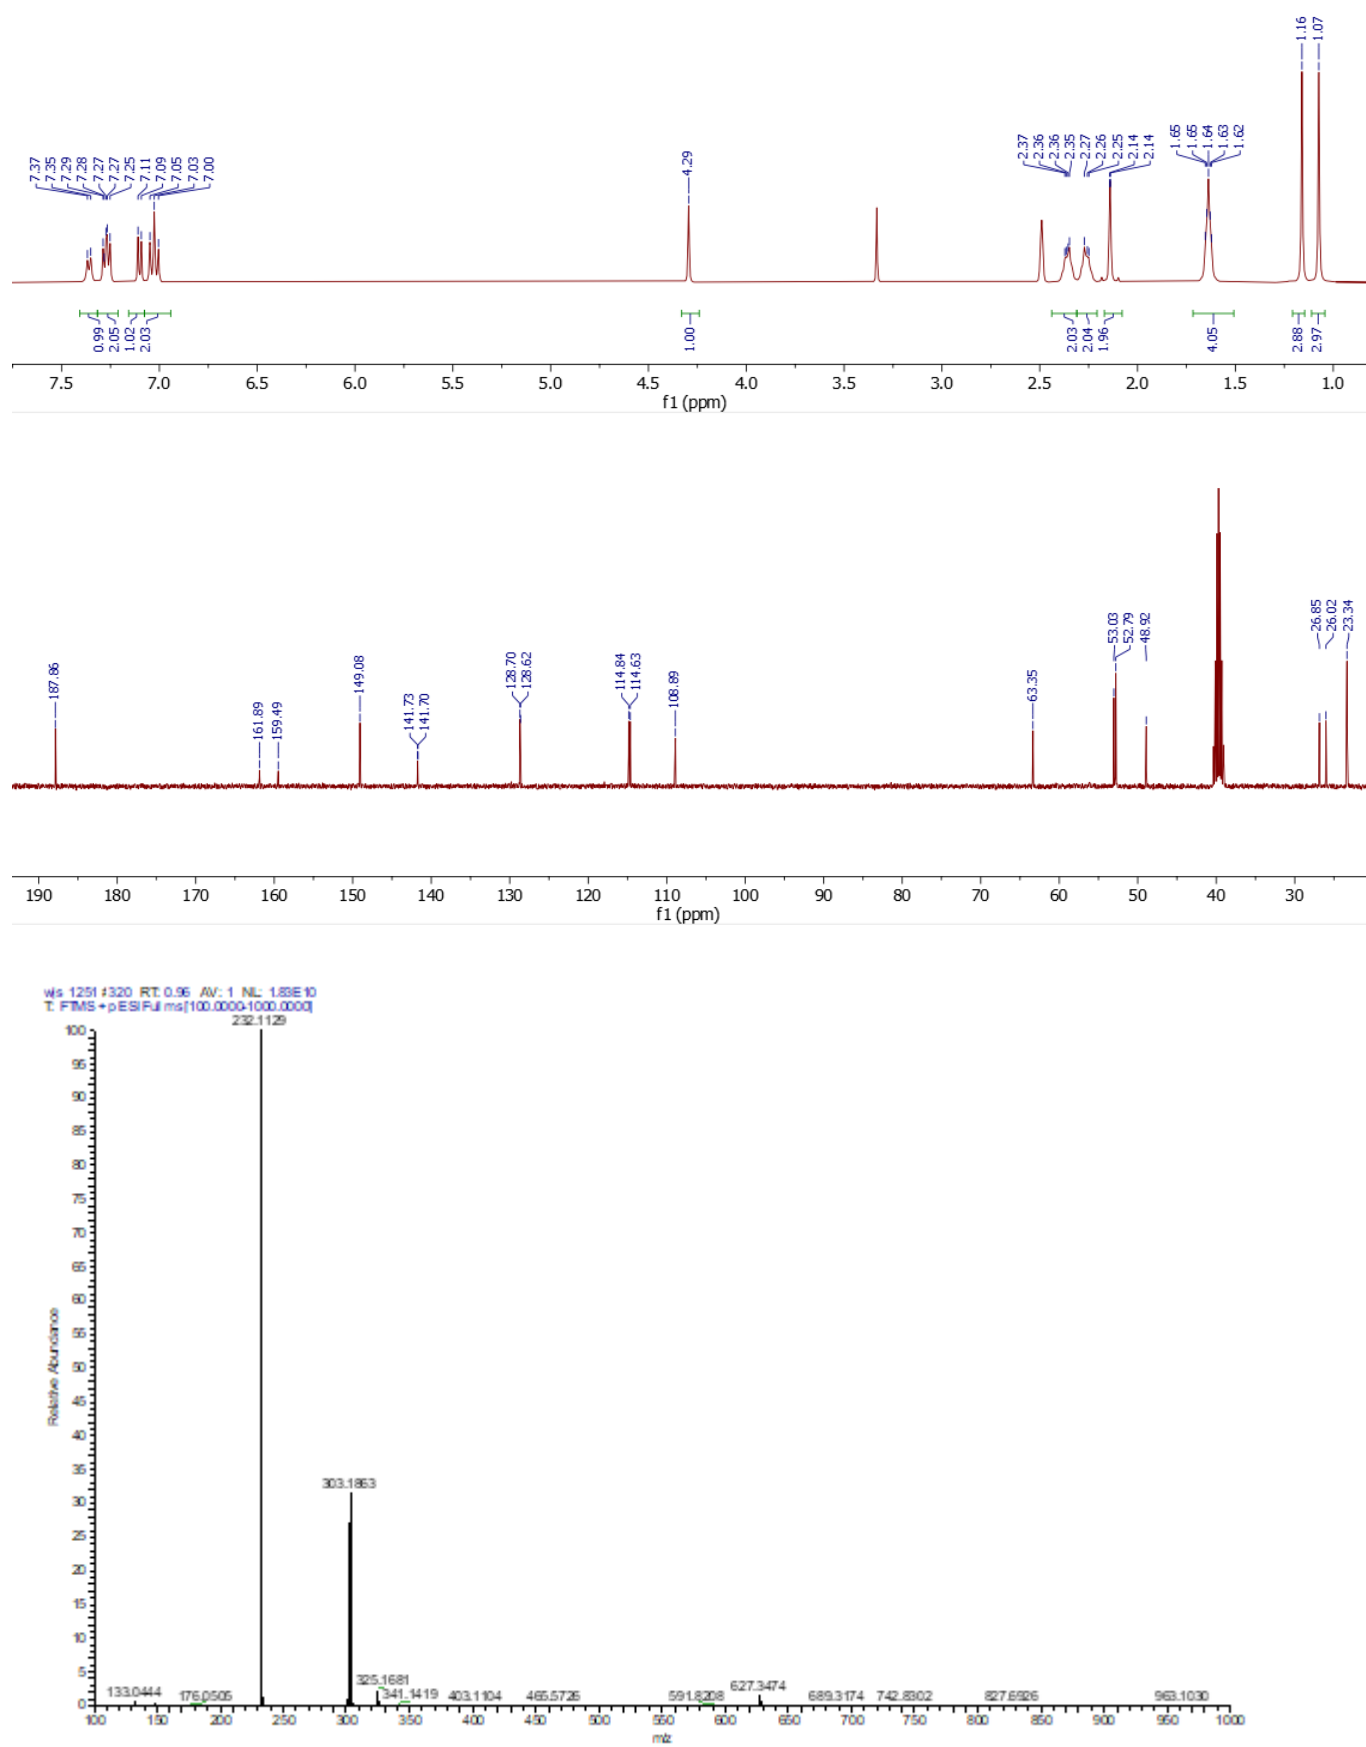

**Figure S6.**  $^1\text{H}$  NMR at 400 MHz,  $^{13}\text{C}$  NMR at 100 MHz spectra, and MS spectra for compound **3b**

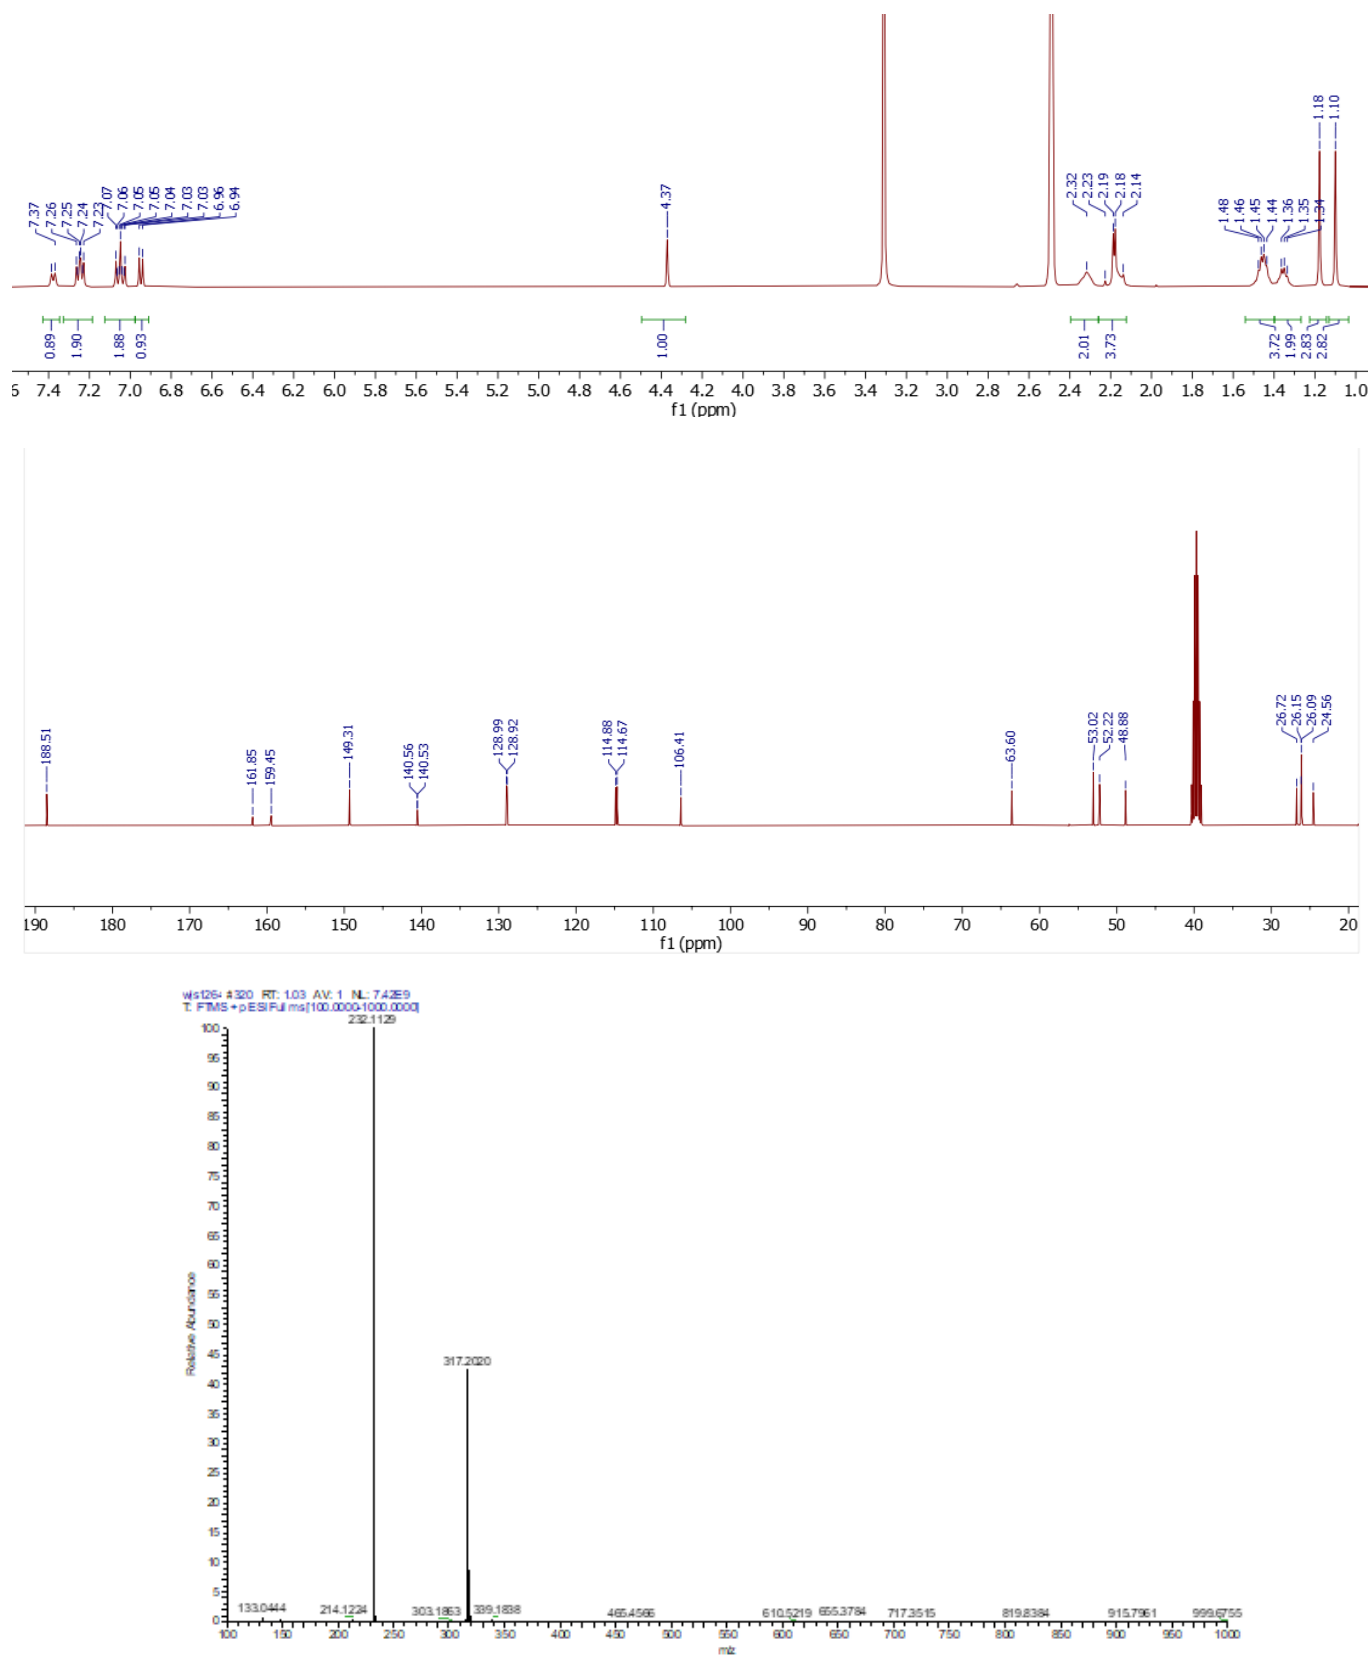

232.1129 [M+H-Piperidin]<sup>+</sup>

**Figure S7.**  $^1\text{H}$  NMR at 400 MHz,  $^{13}\text{C}$  NMR at 100 MHz spectra, and MS spectra for compound **3c**

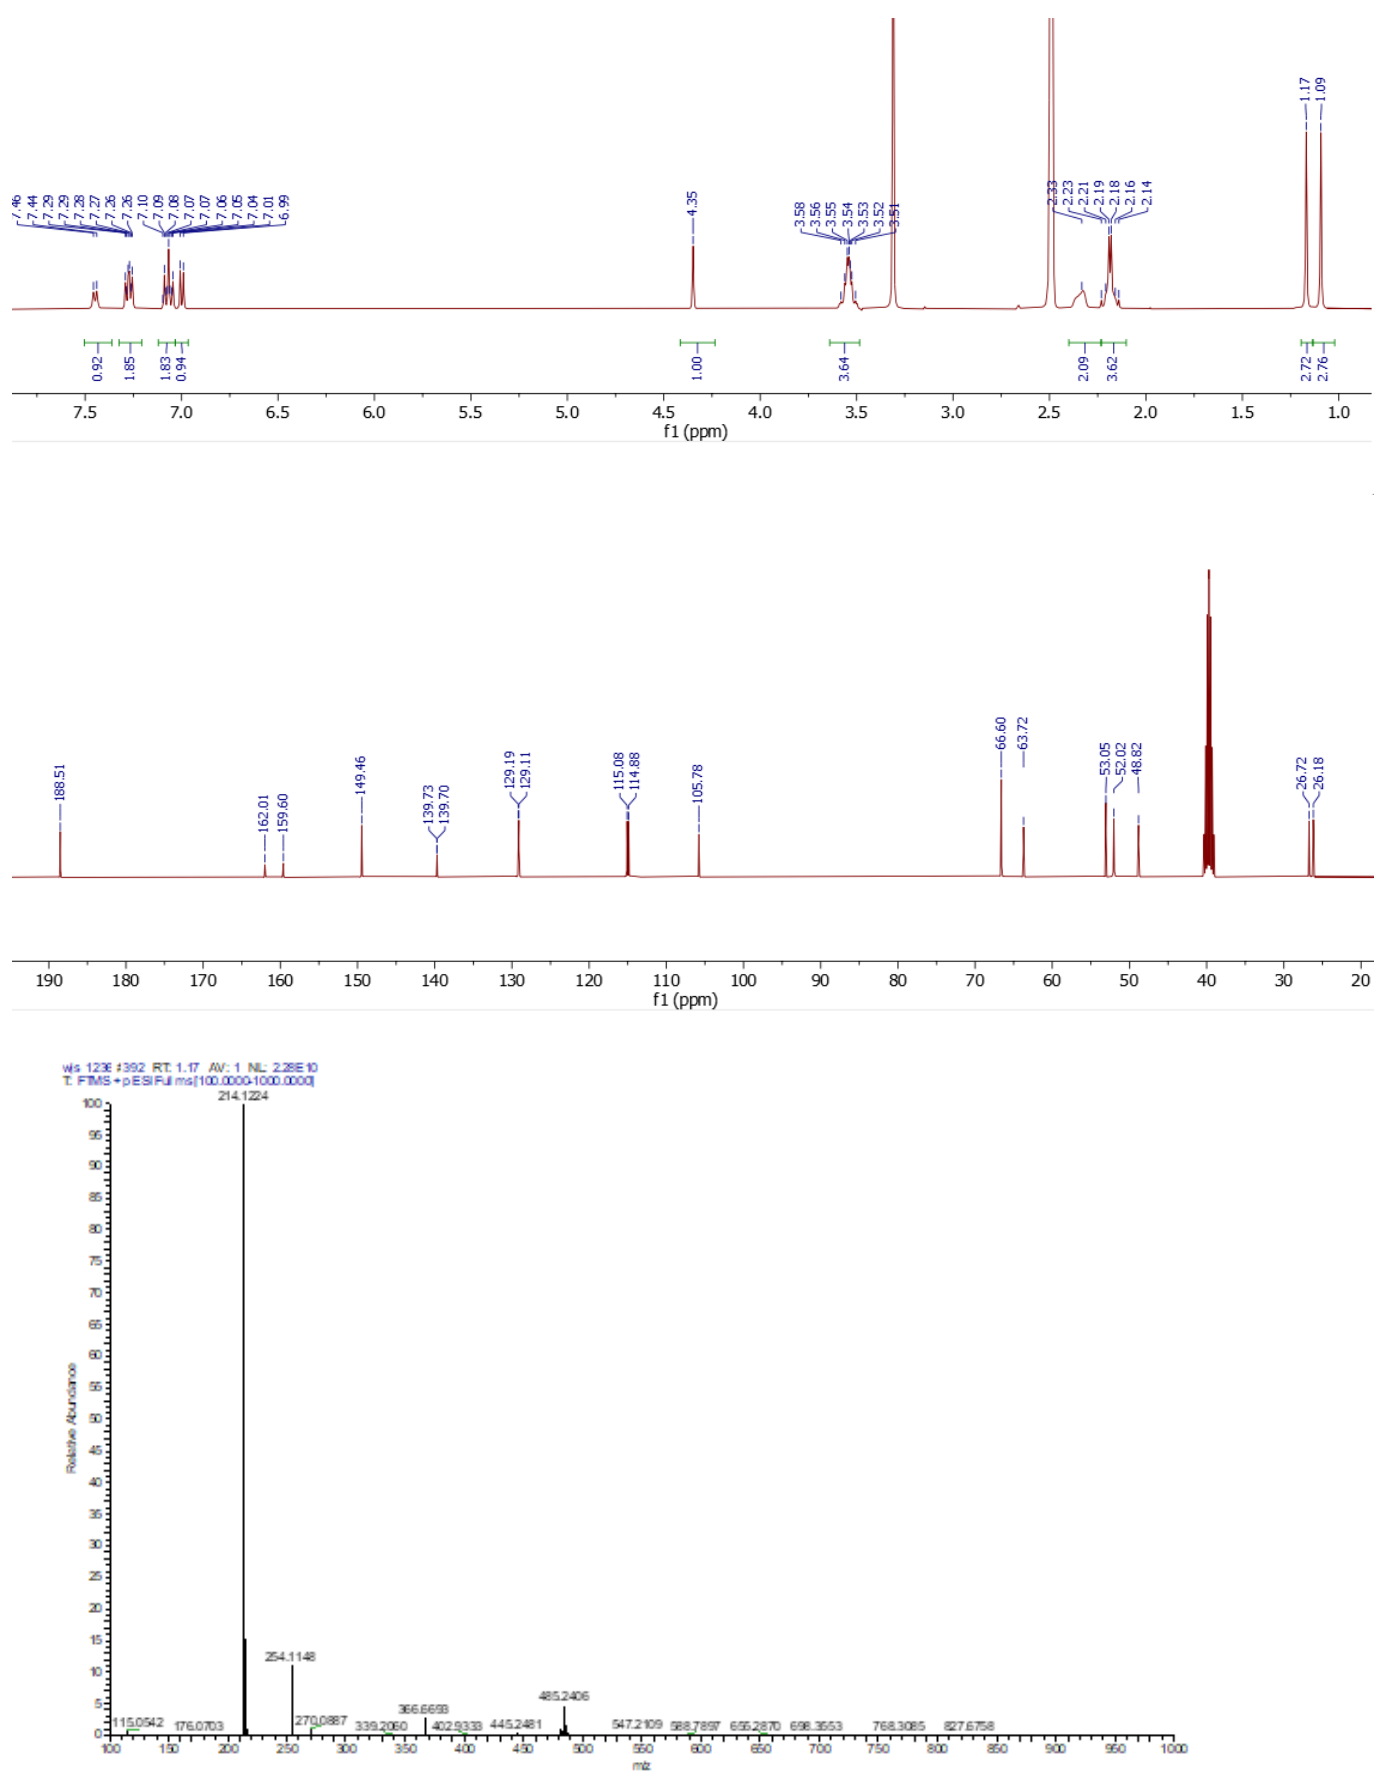

214= M+H-Morpholin

Figure S8.  $^1\text{H}$  NMR at 400 MHz,  $^{13}\text{C}$  NMR at 100 MHz spectra, and MS spectra for compound 4a

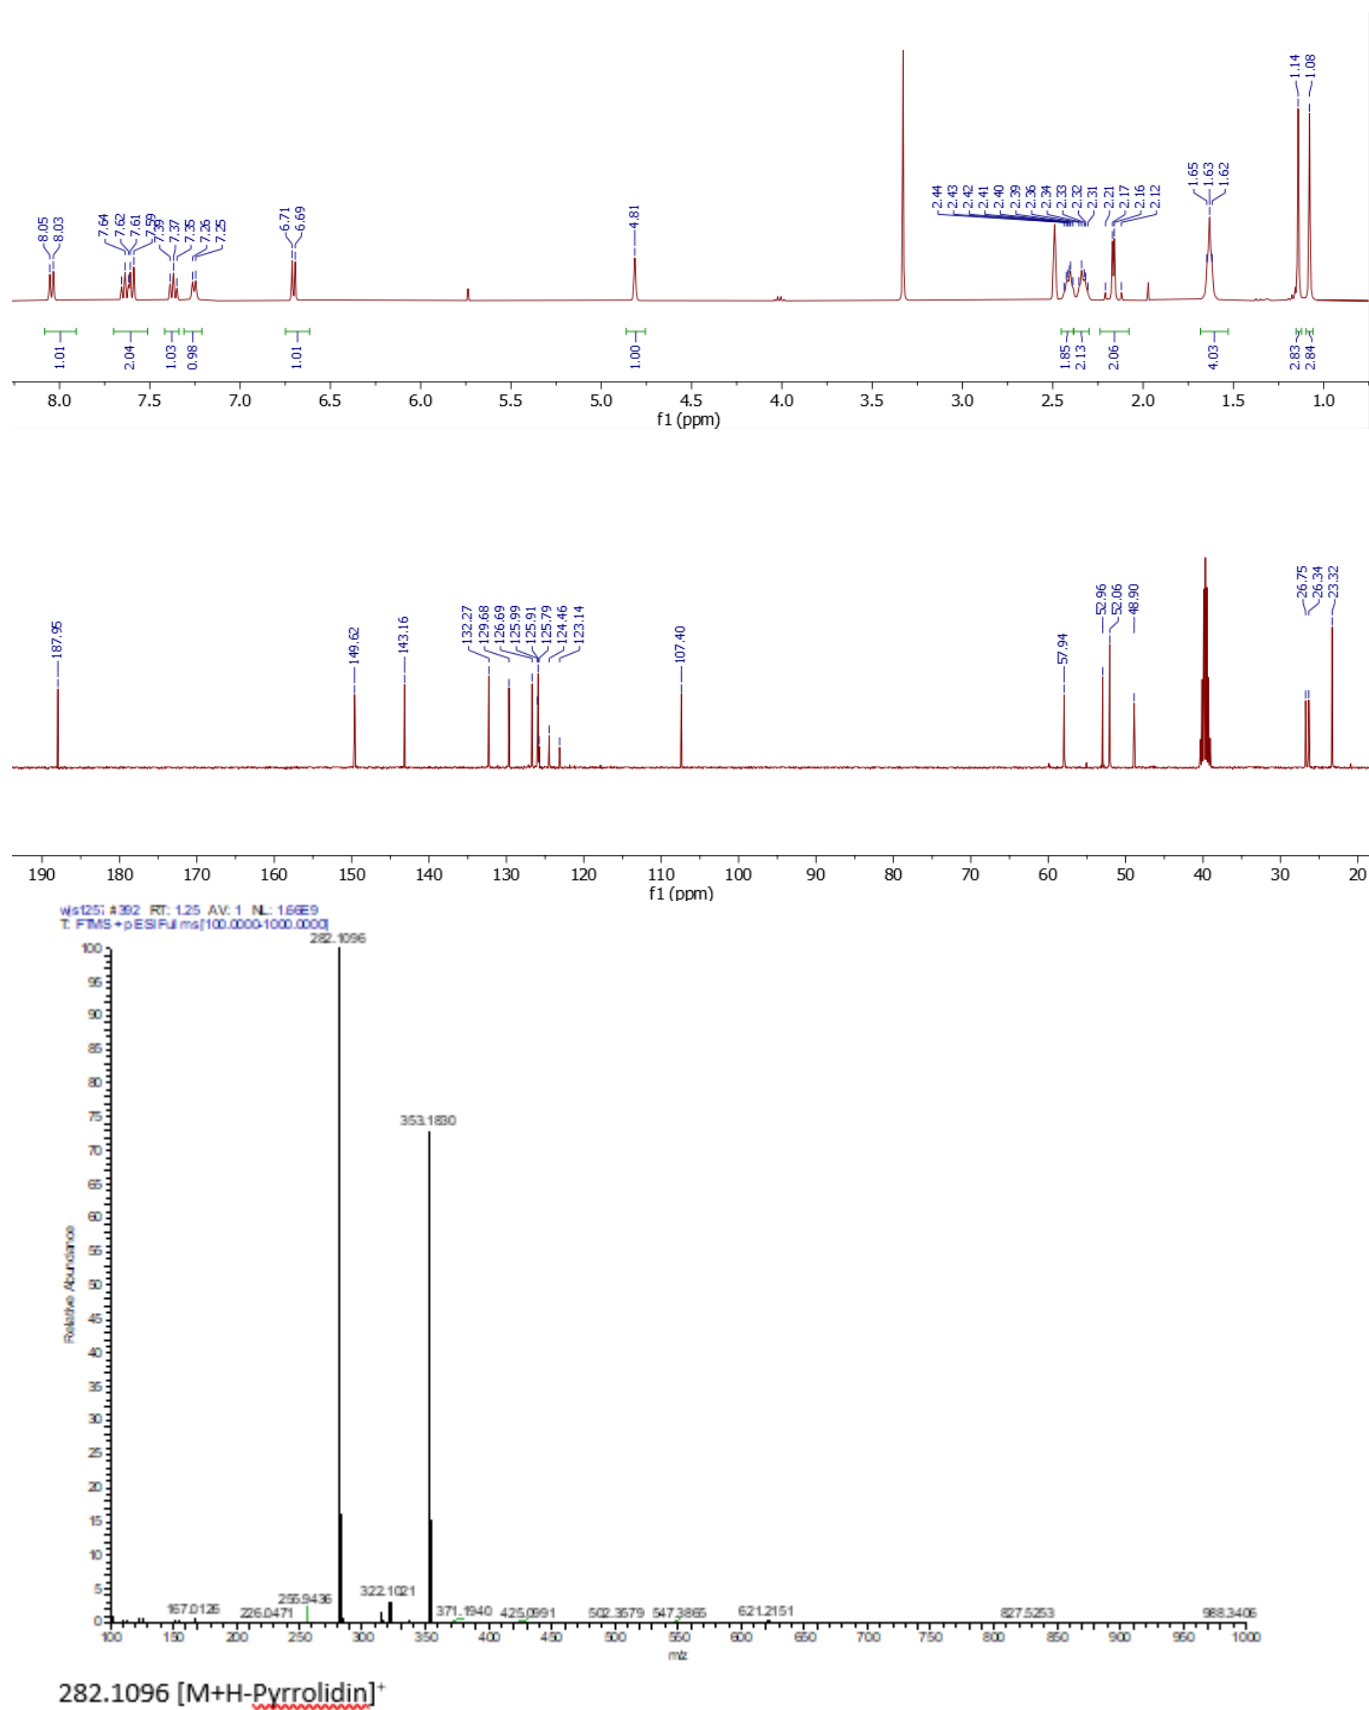

**Figure S9.**  $^1\text{H}$  NMR at 400 MHz,  $^{13}\text{C}$  NMR at 100 MHz spectra, and MS spectra for compound **4b**

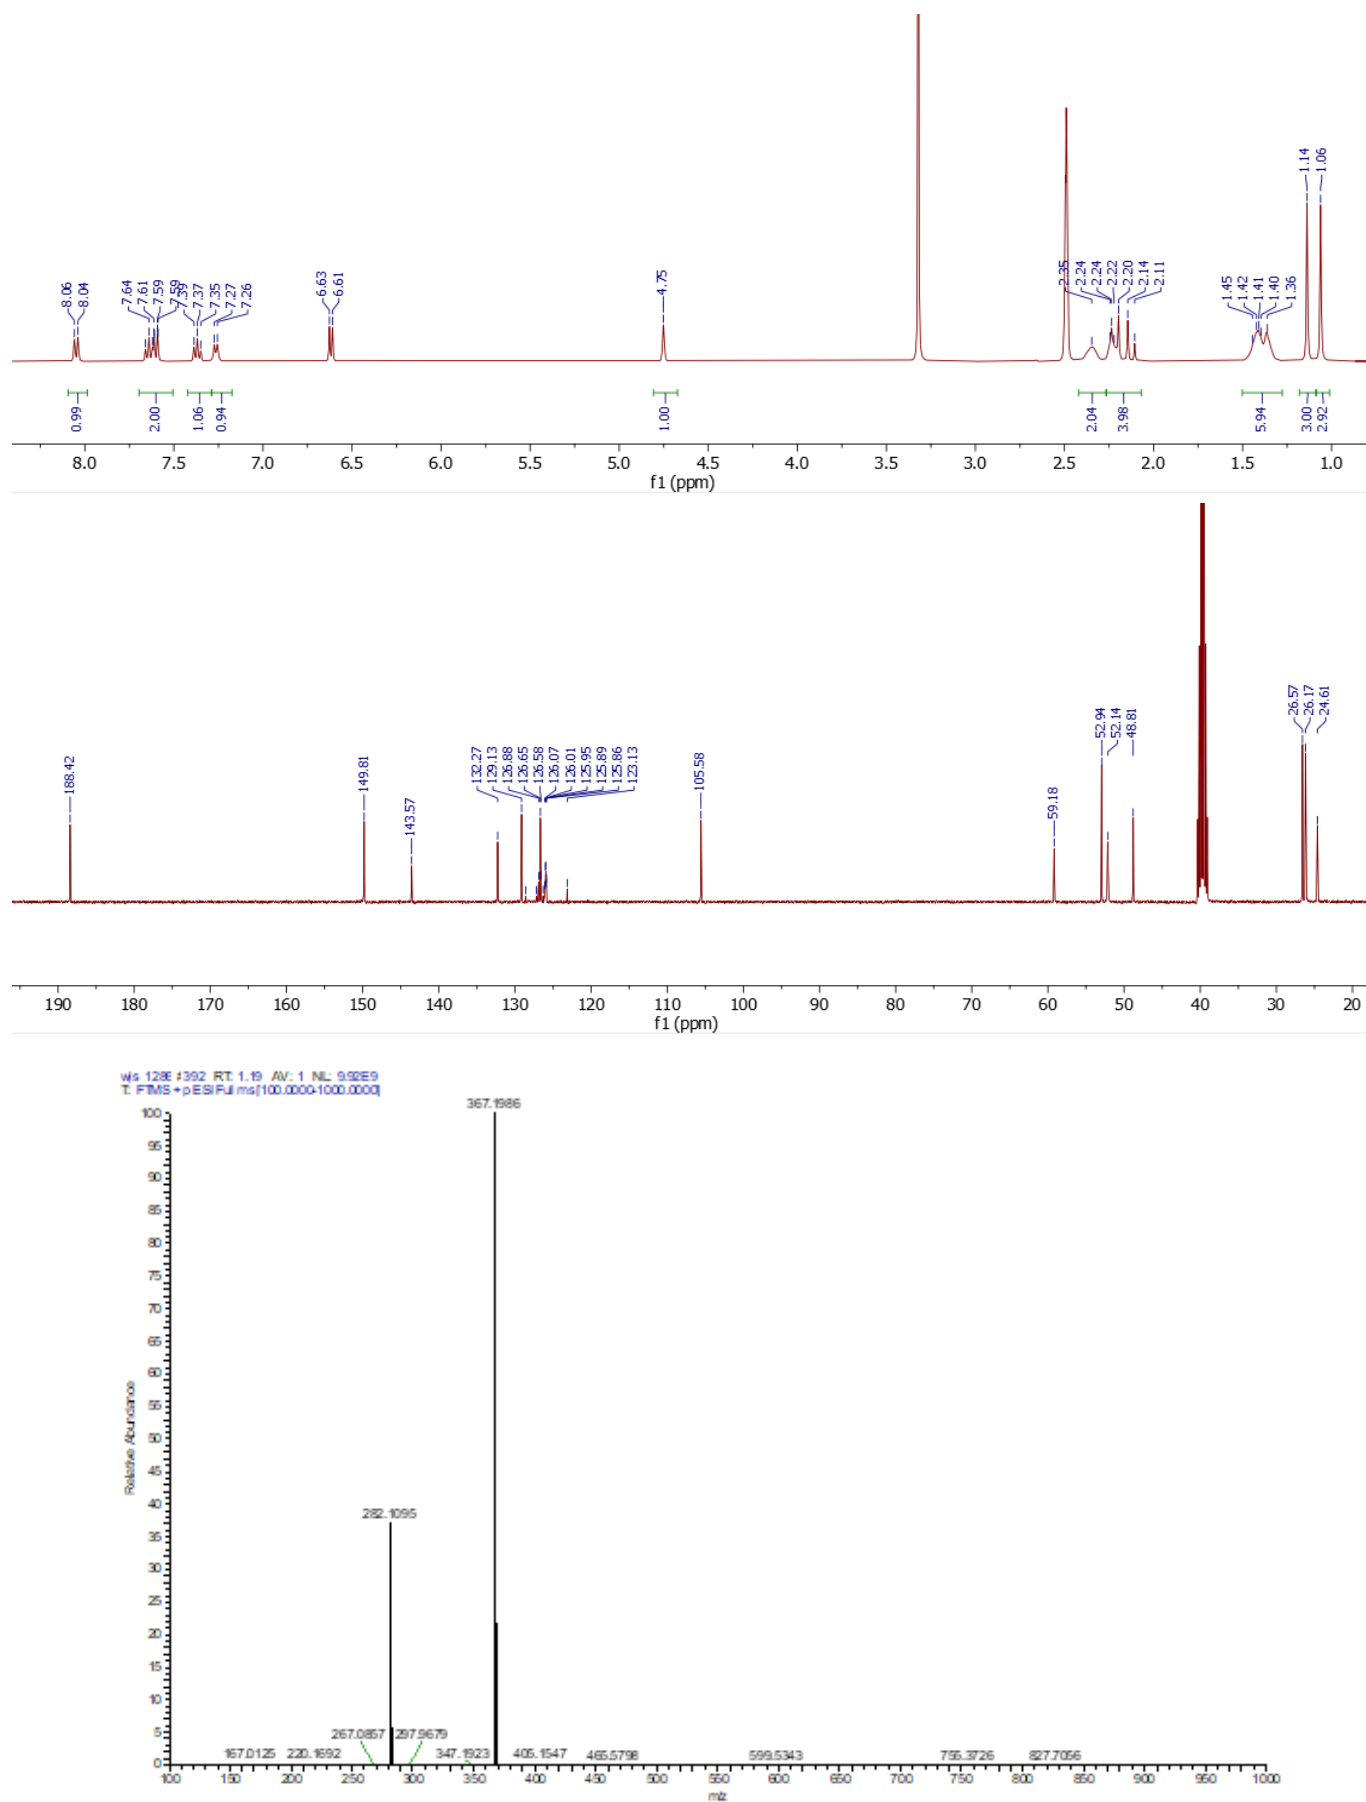

282 = M+H-Piperidin

**Figure S10.**  $^1\text{H}$  NMR at 400 MHz,  $^{13}\text{C}$  NMR at 100 MHz spectra, and MS spectra for compound **5a**

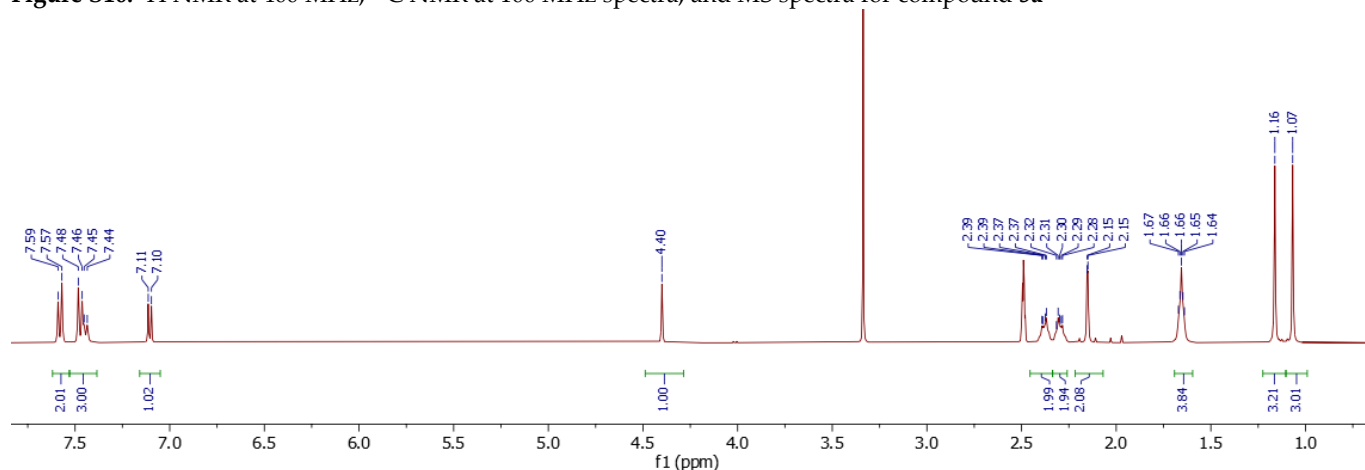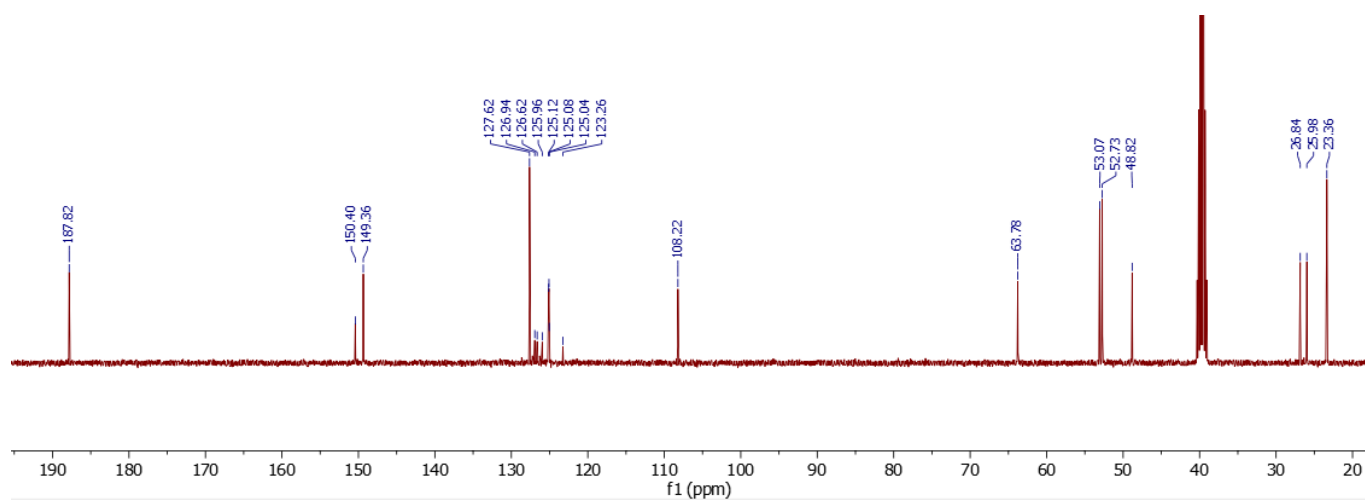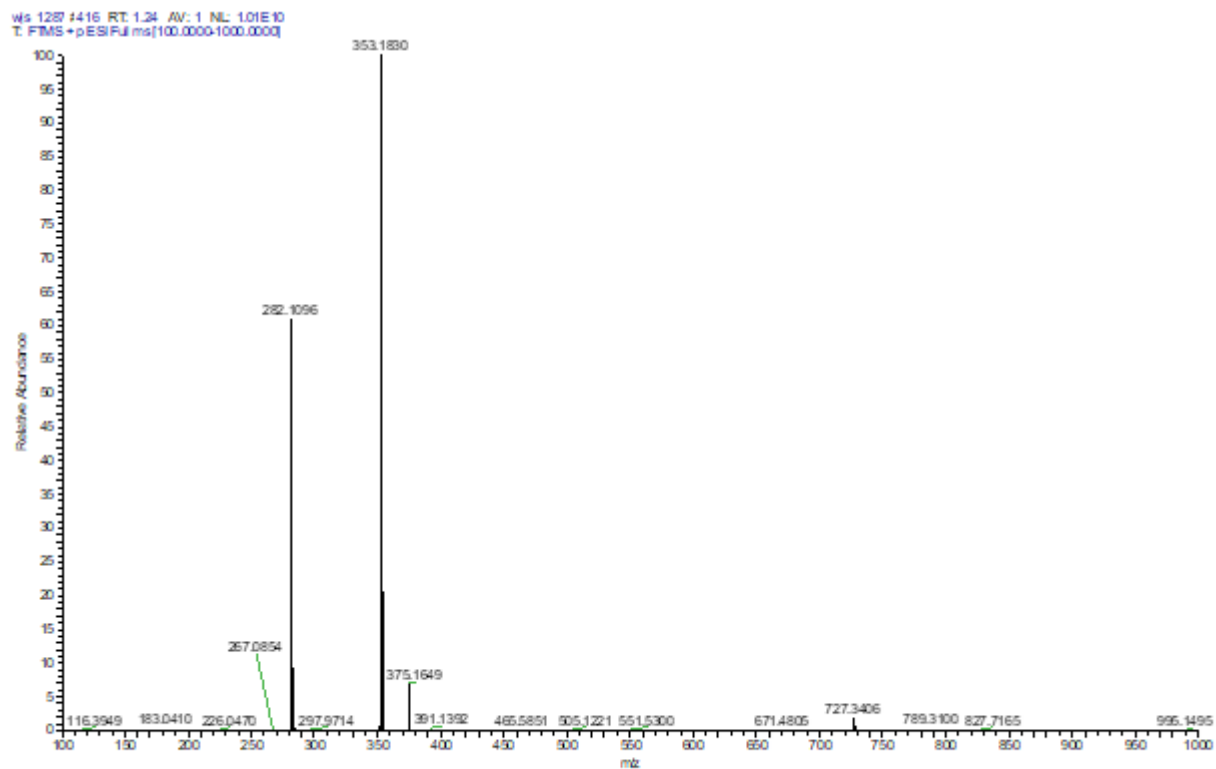

282= M+H-Pyrrolidin

**Figure S11.**  $^1\text{H}$  NMR at 400 MHz,  $^{13}\text{C}$  NMR at 100 MHz spectra, and MS spectra for compound **5b**

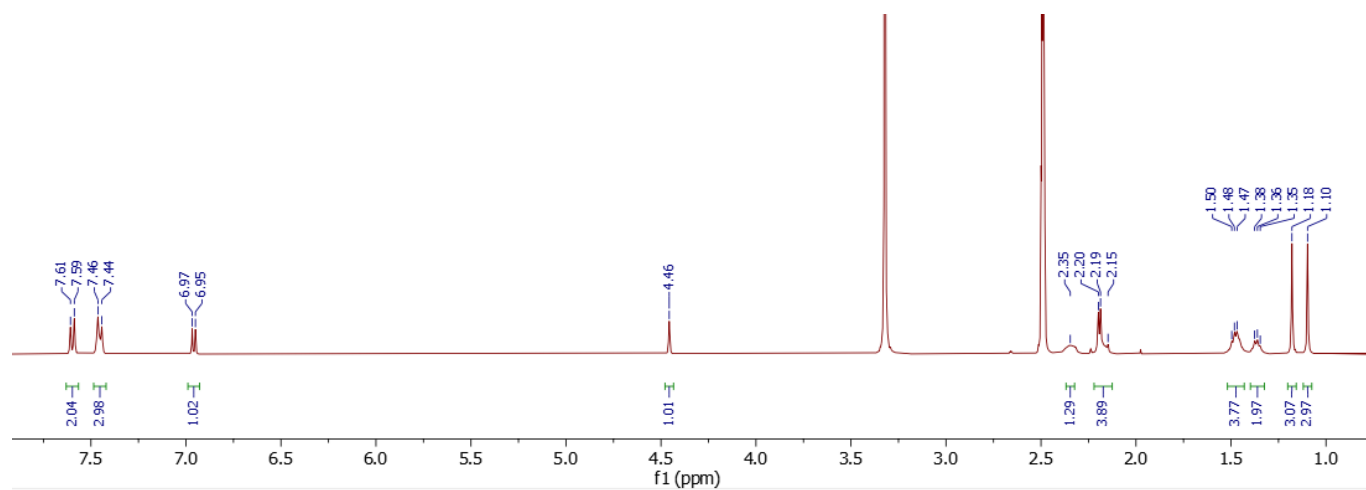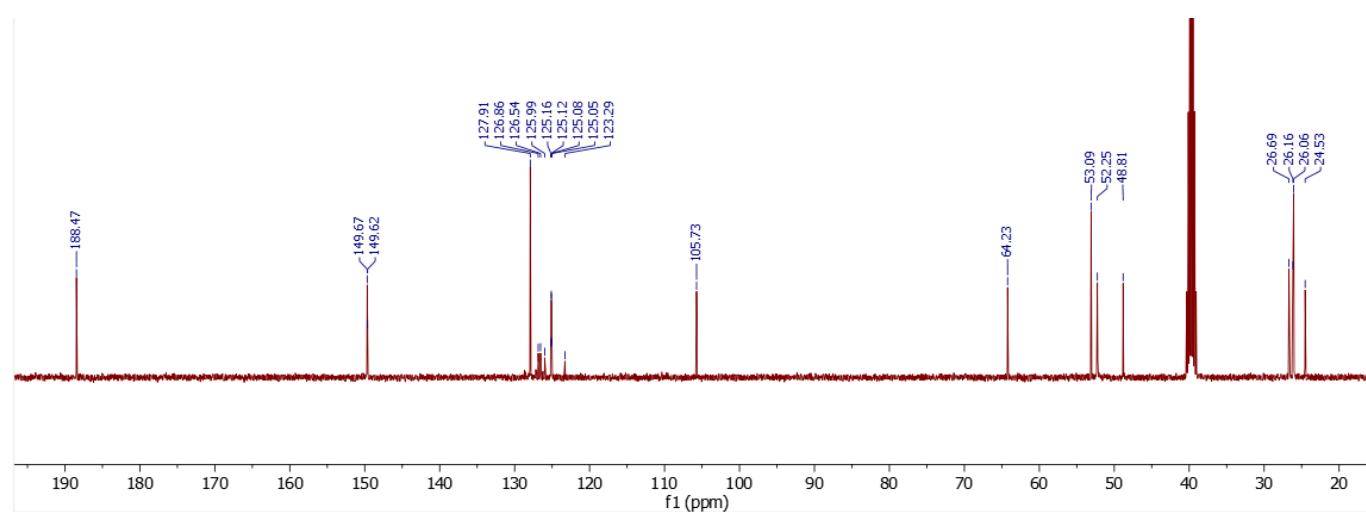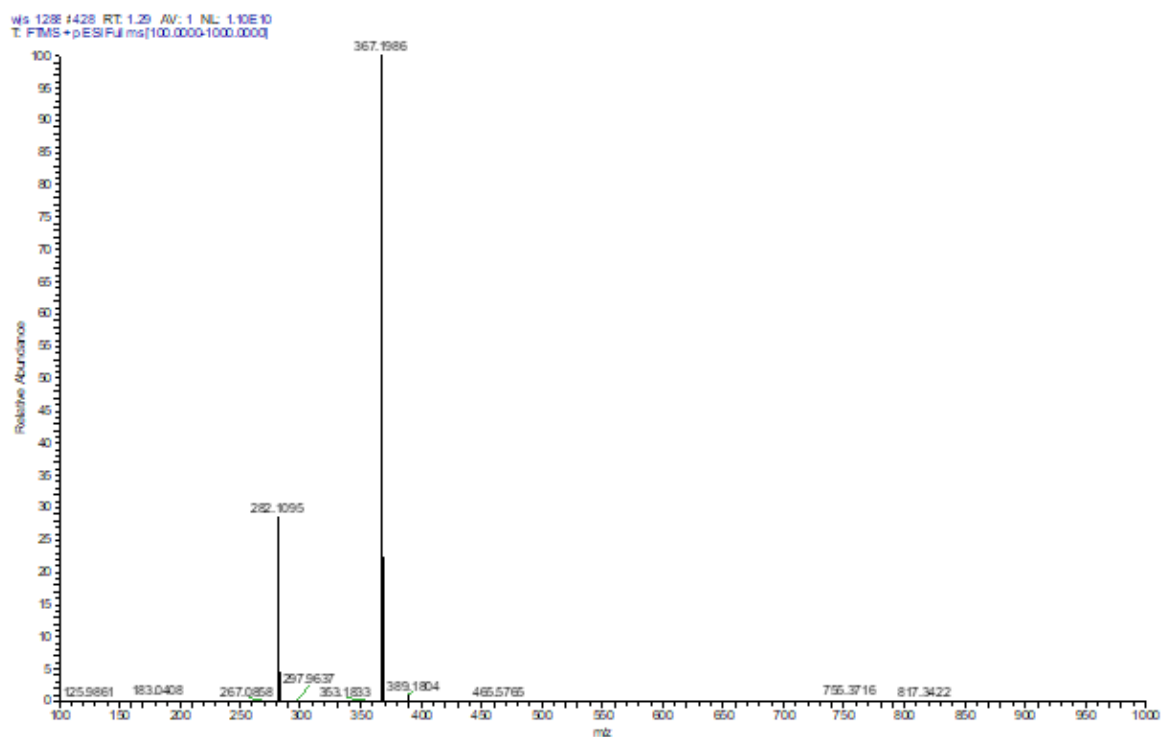

282= M+H-Piperidin

**Figure S12.**  $^1\text{H}$  NMR at 400 MHz,  $^{13}\text{C}$  NMR at 100 MHz spectra, and MS spectra for compound **6a**

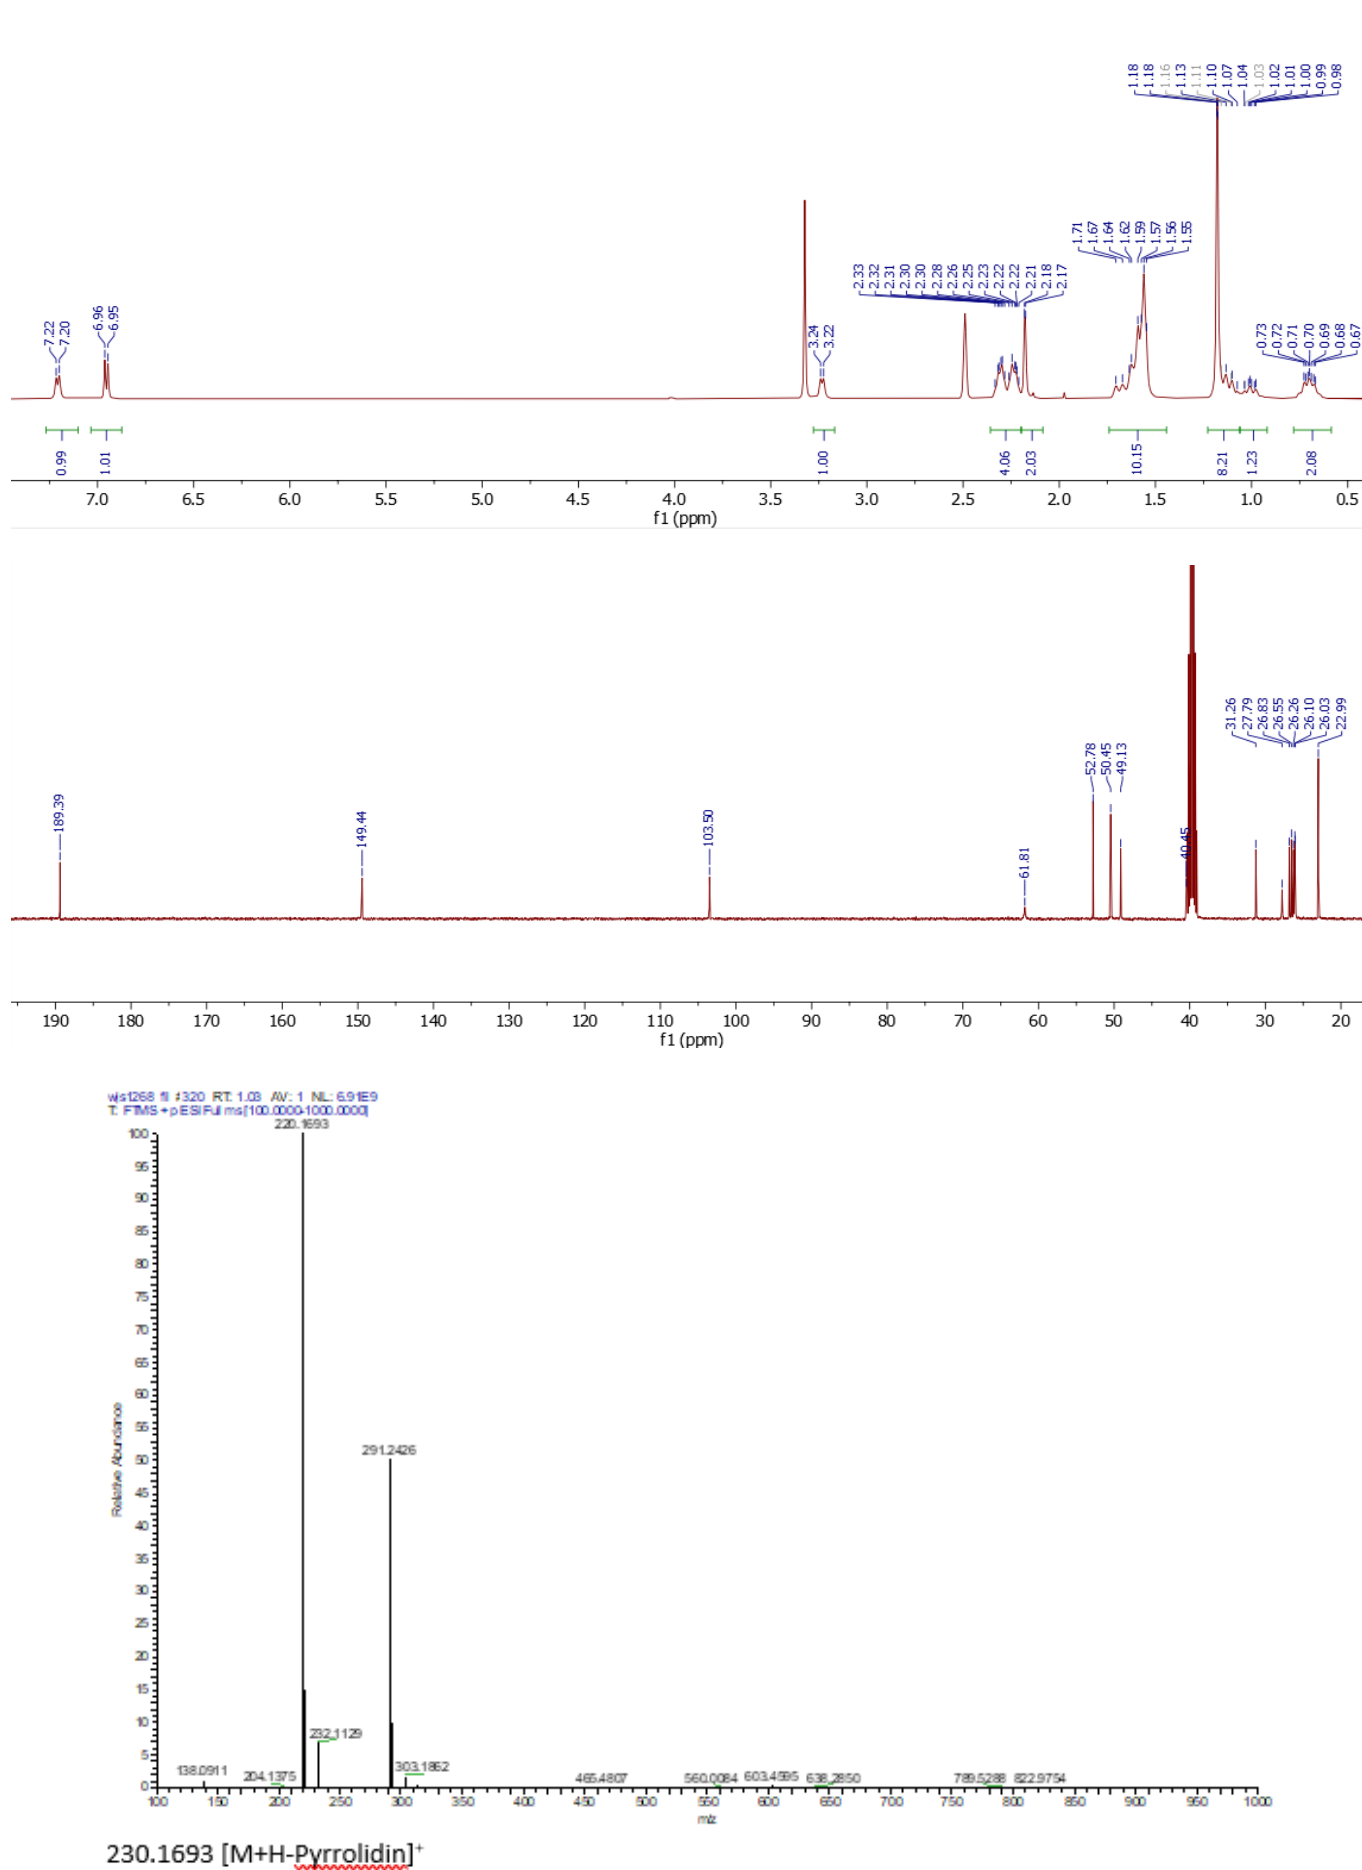



**Figure S13.**  $^1\text{H}$  NMR at 400 MHz,  $^{13}\text{C}$  NMR at 100 MHz spectra, and MS spectra for compound **6b**

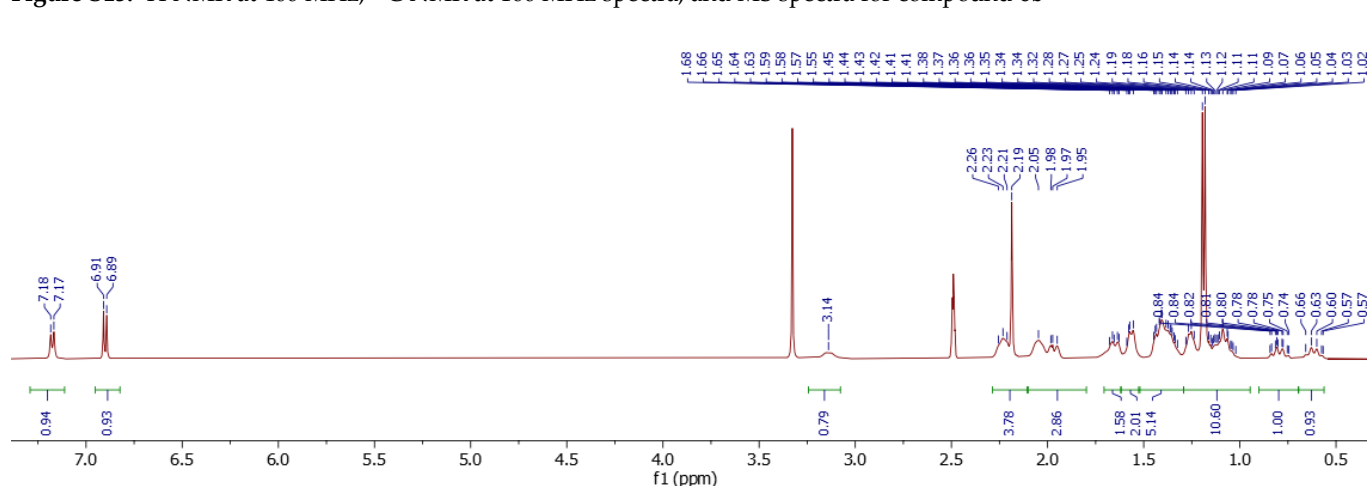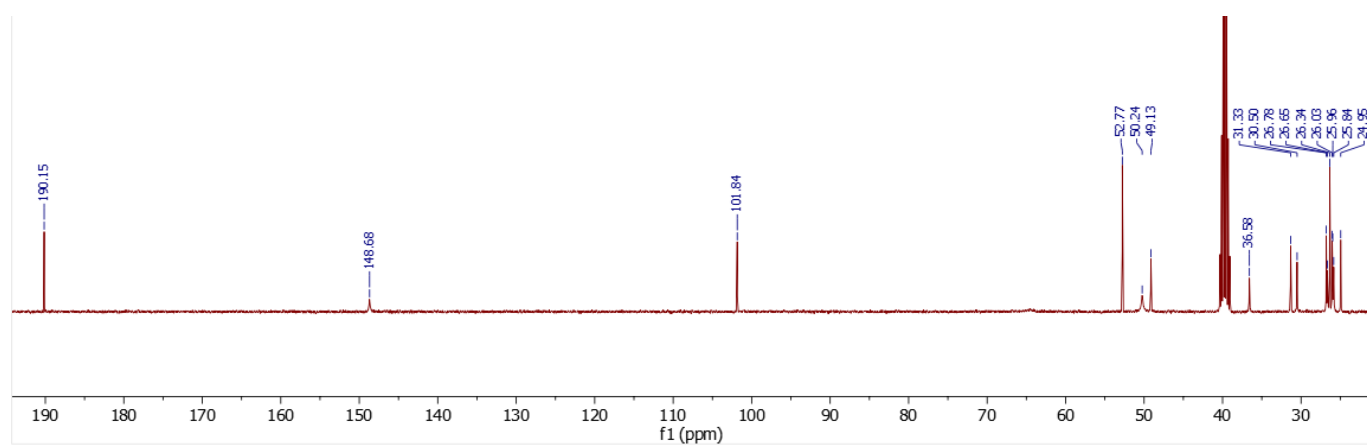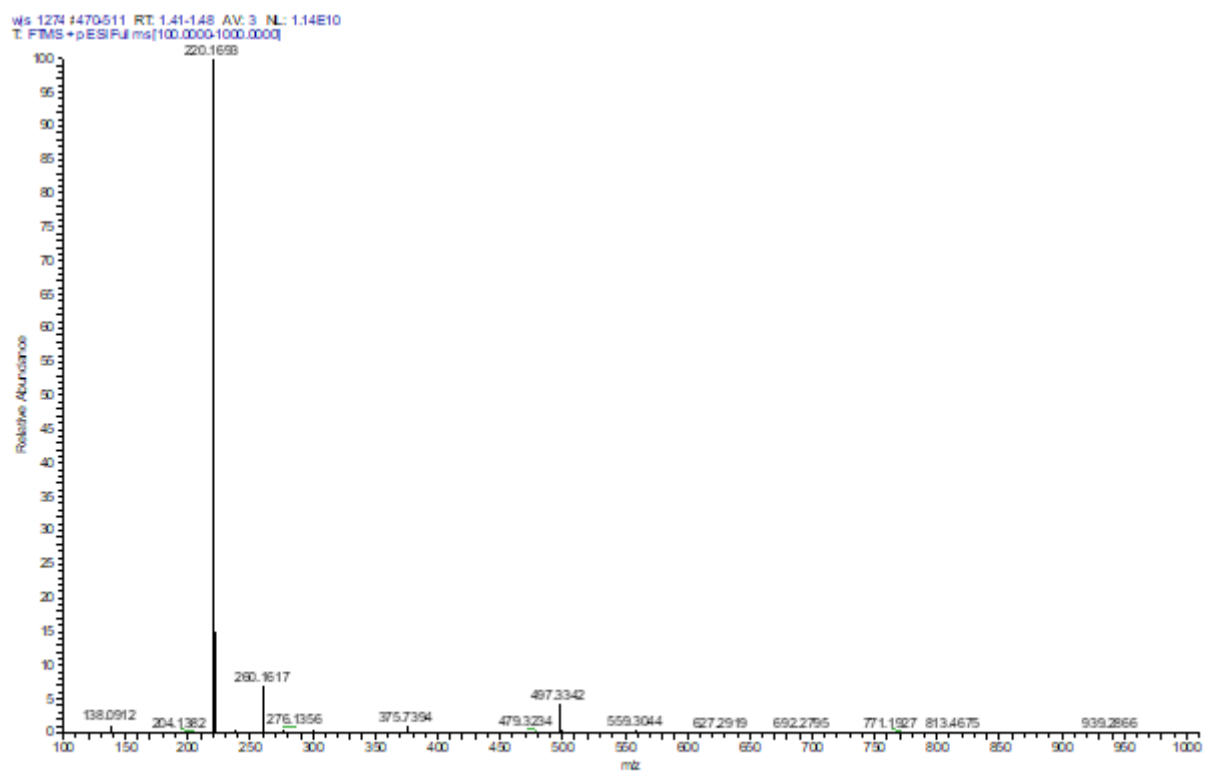

M+H-Piperidin

**Figure S14.**  $^1\text{H}$  NMR at 400 MHz,  $^{13}\text{C}$  NMR at 100 MHz spectra, and MS spectra for compound **7a**

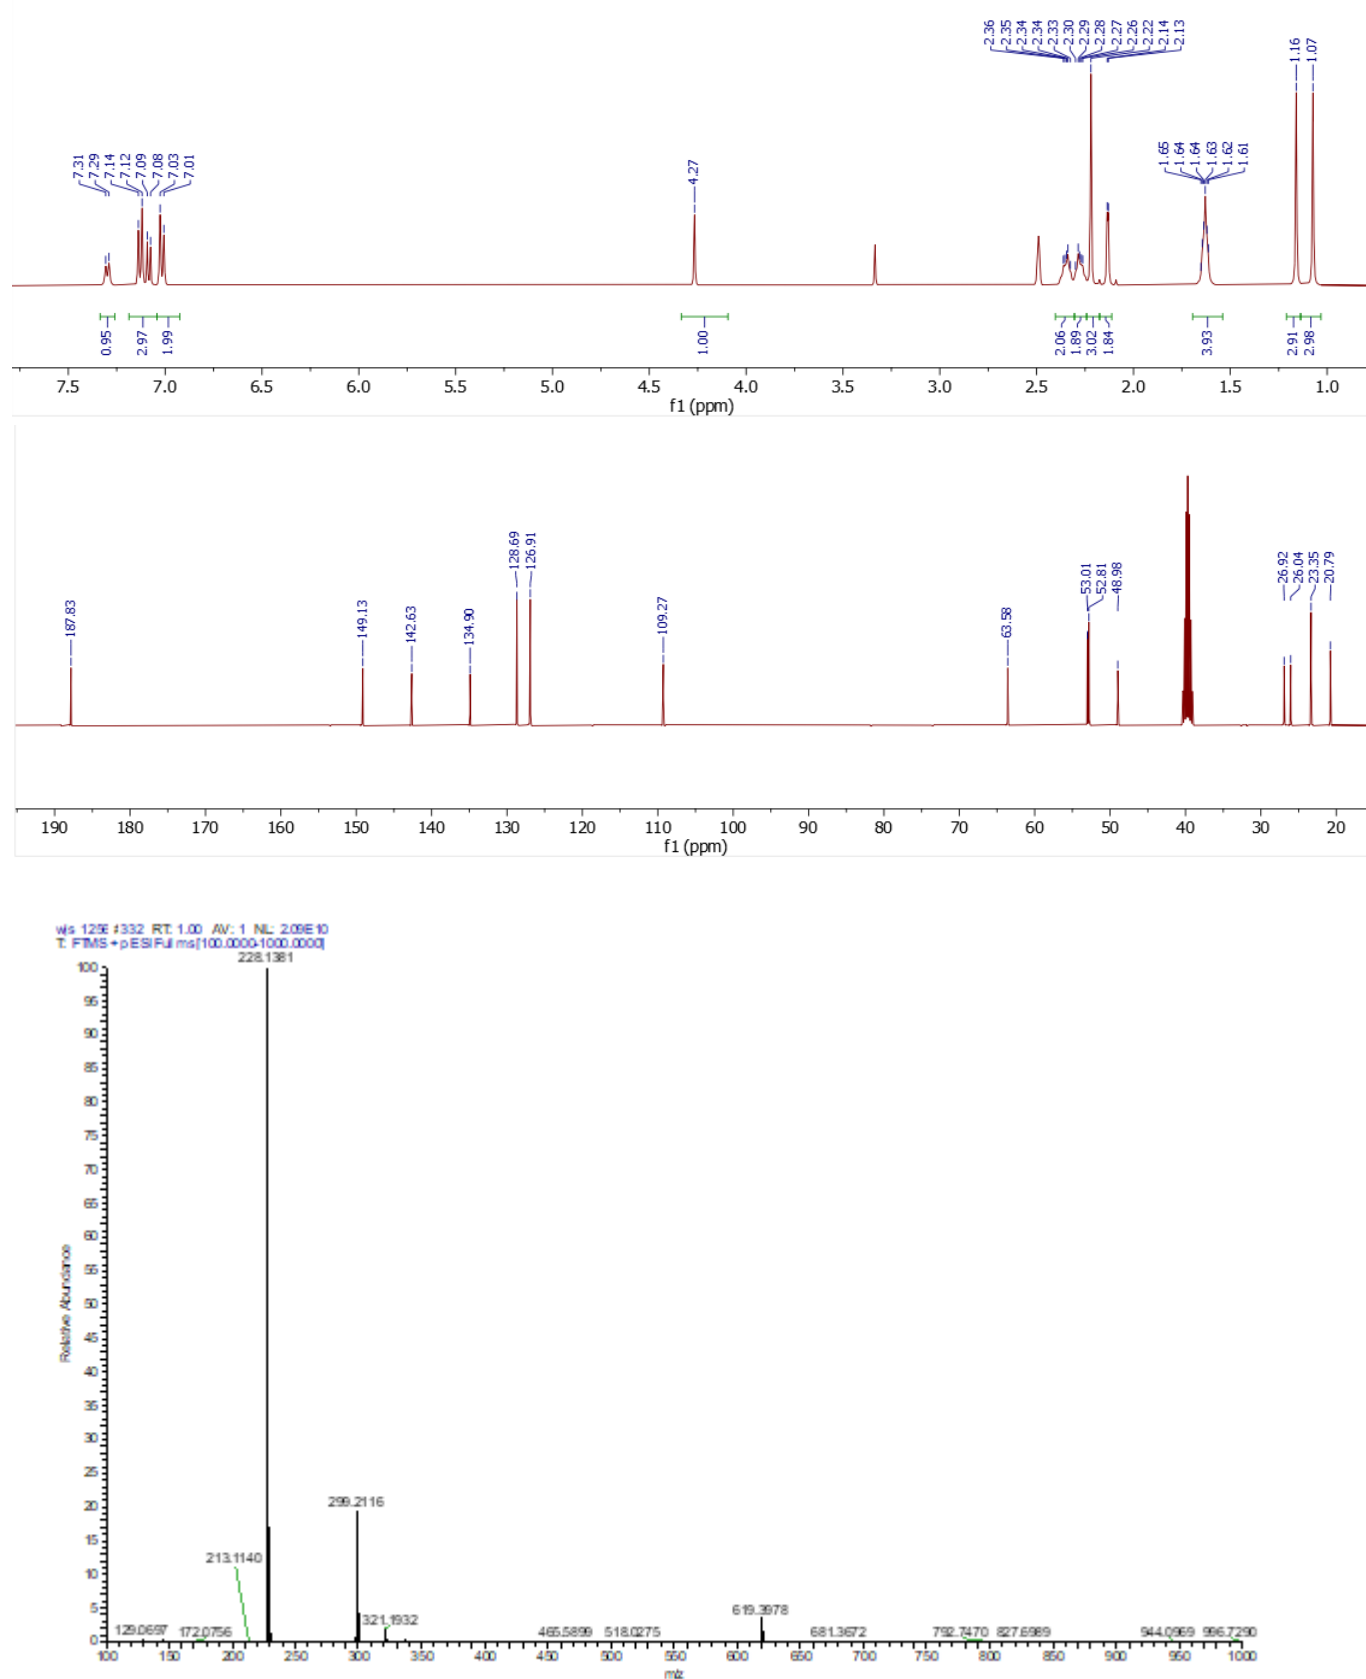

228= M+H-Pyrrolidin

**Figure S15.**  $^1\text{H}$  NMR at 400 MHz,  $^{13}\text{C}$  NMR at 100 MHz spectra, and MS spectra for compound **8a**

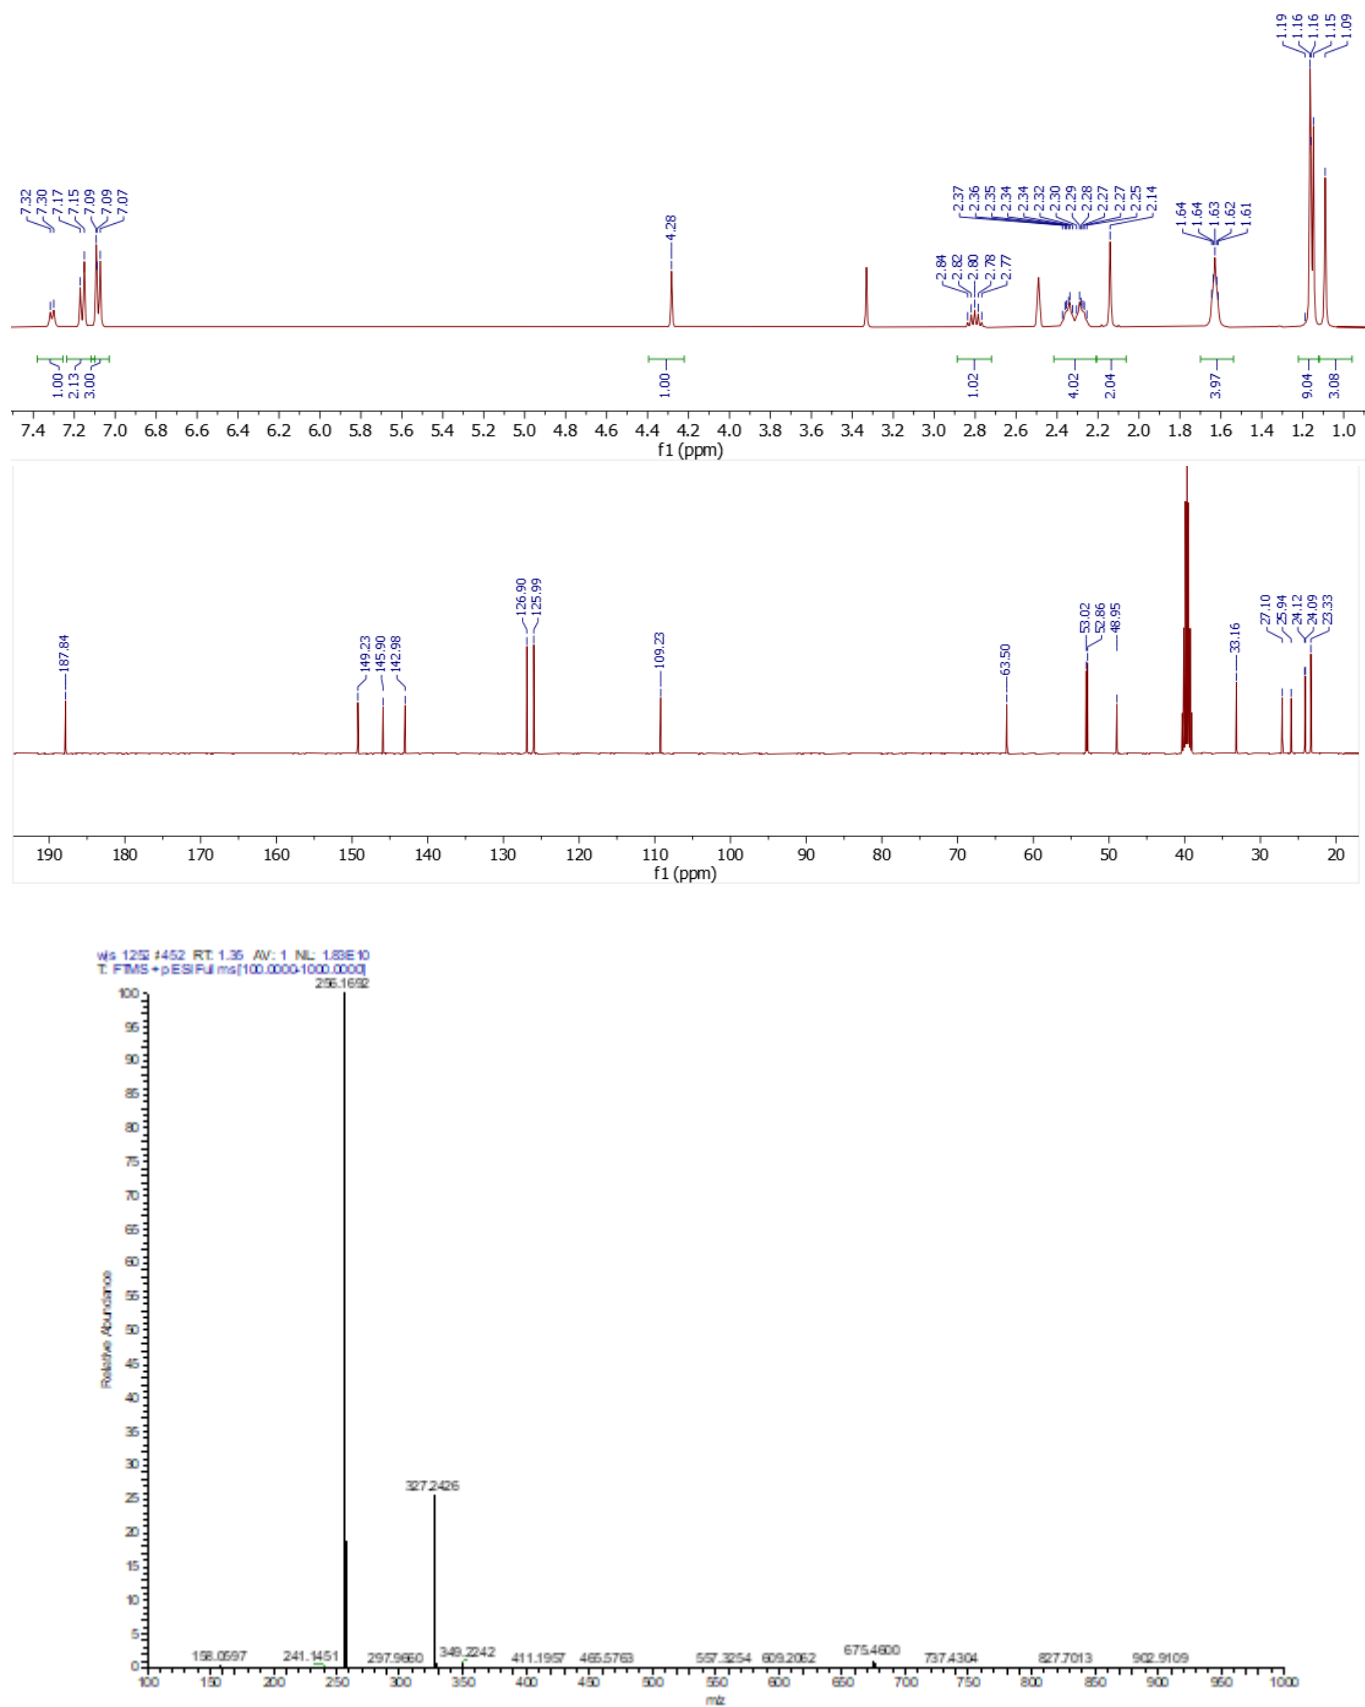

**Figure S16.**  $^1\text{H}$  NMR at 400 MHz,  $^{13}\text{C}$  NMR at 100 MHz spectra, and MS spectra for compound **9a**

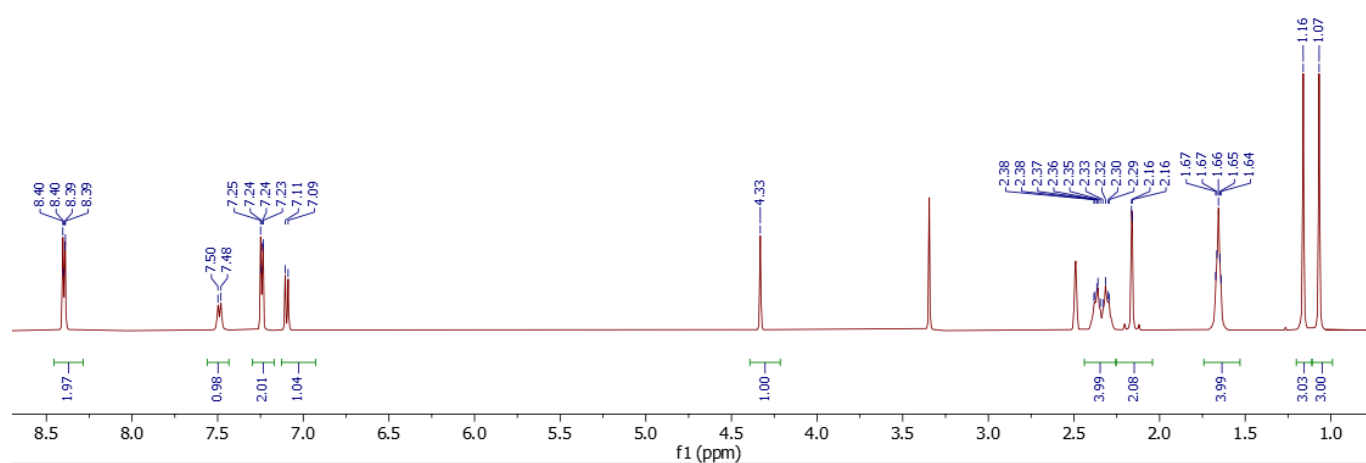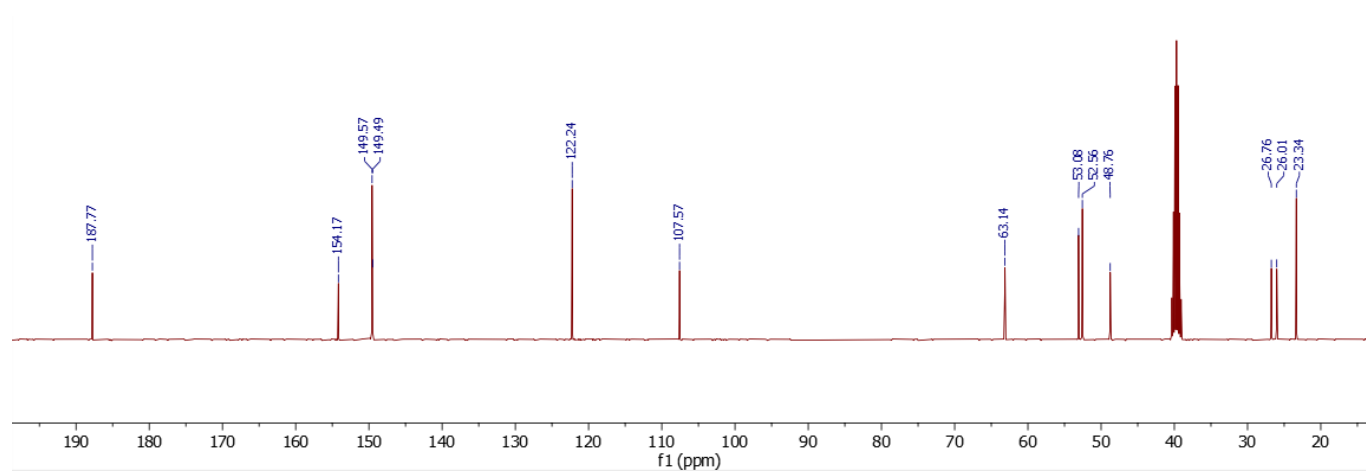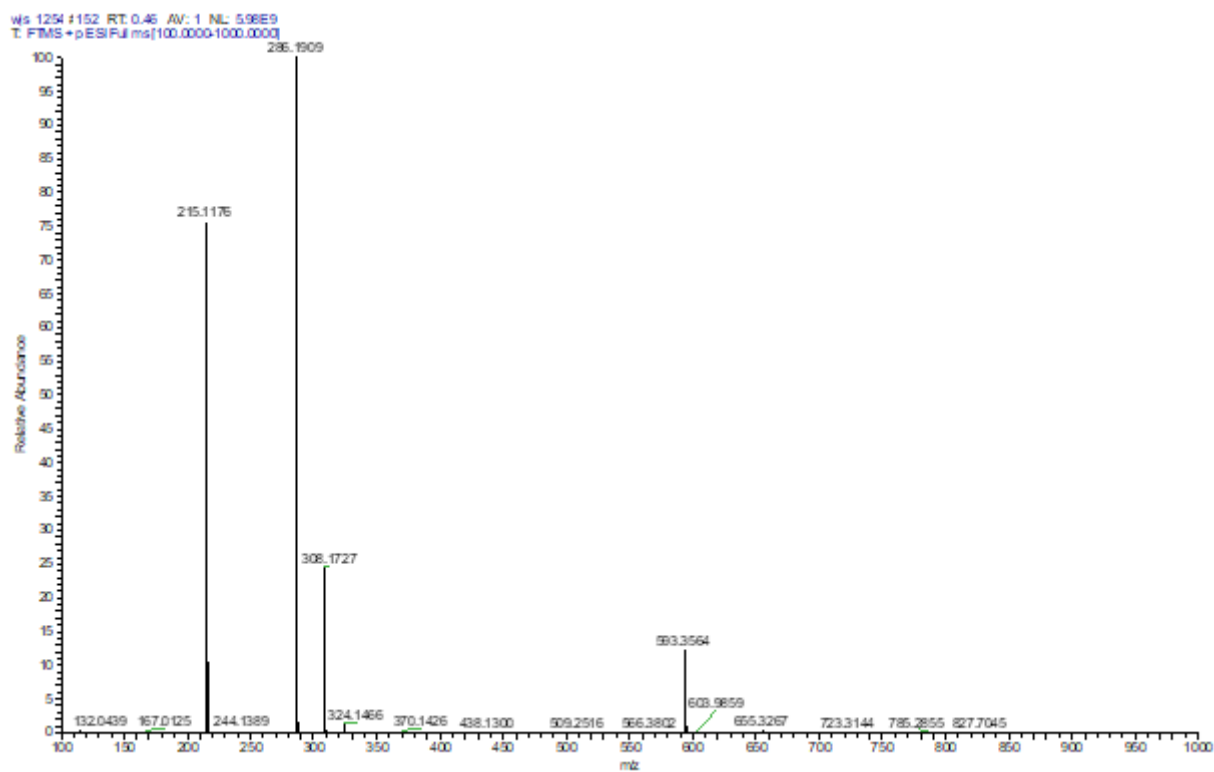

**Figure S17.**  $^1\text{H}$  NMR at 400 MHz,  $^{13}\text{C}$  NMR at 100 MHz spectra, and MS spectra for compound **10a**

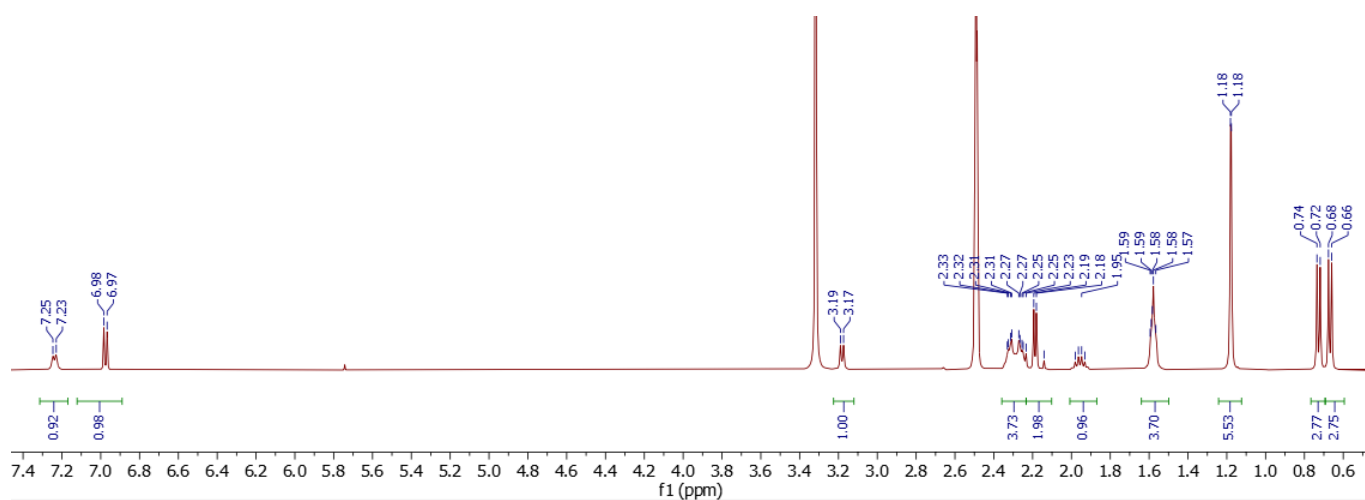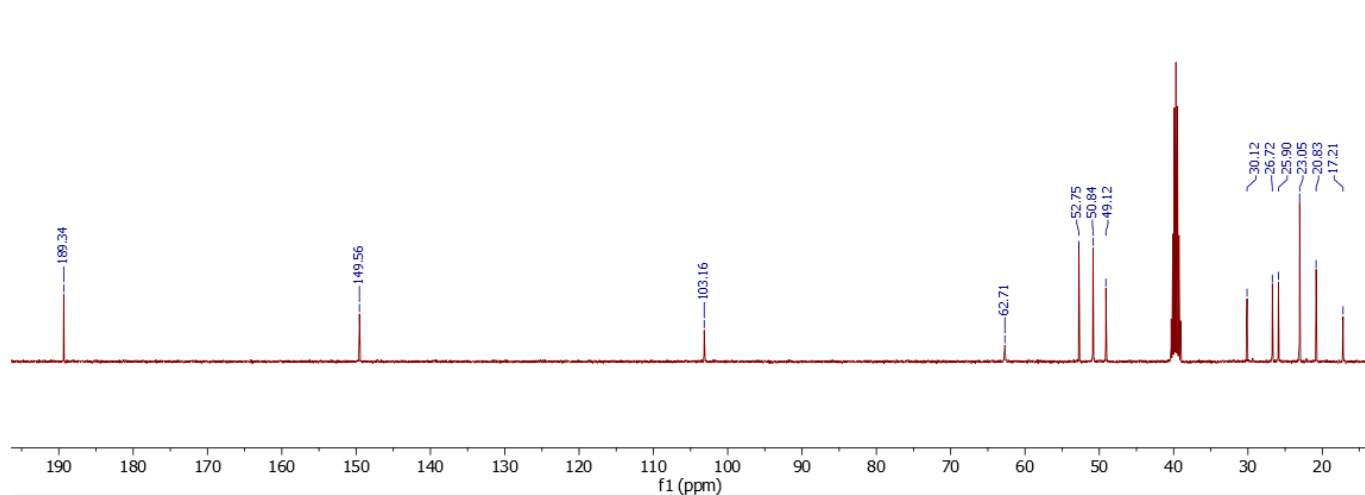

WUS 1338, HCOOH, ES, (P) #188, RT: 0.74, AV: 1, NL: 1.02E10  
 E: F (MS + pE S) full ms [100.0000-700.0000]

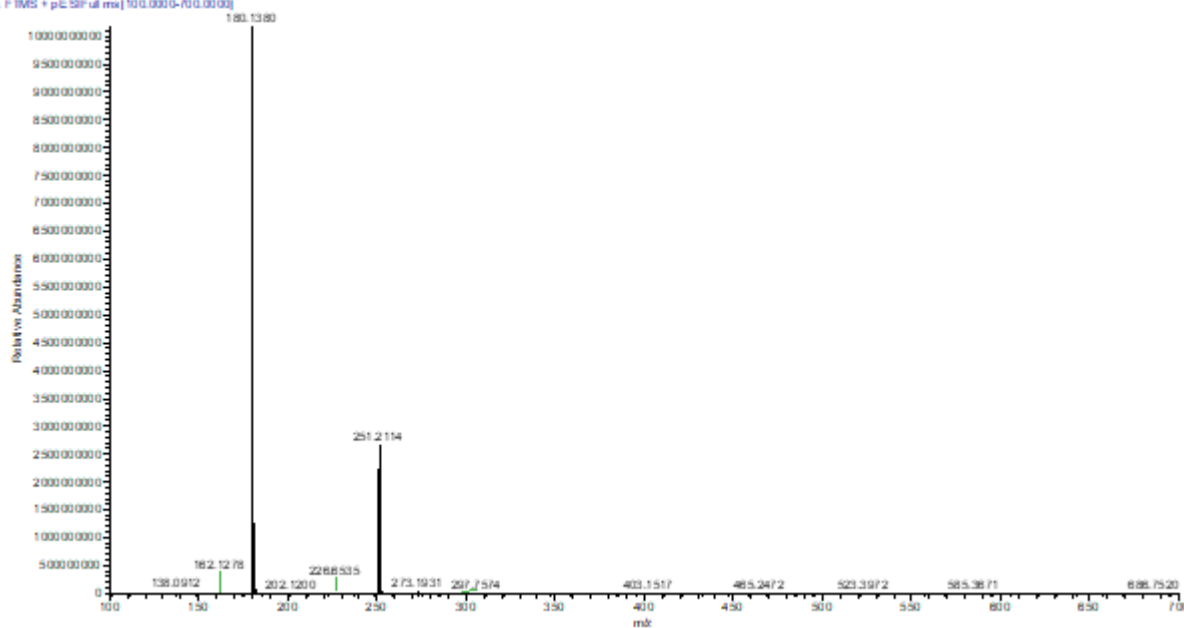

**Figure S18.**  $^1\text{H}$  NMR at 400 MHz,  $^{13}\text{C}$  NMR at 100 MHz spectra, and MS spectra for compound **11**

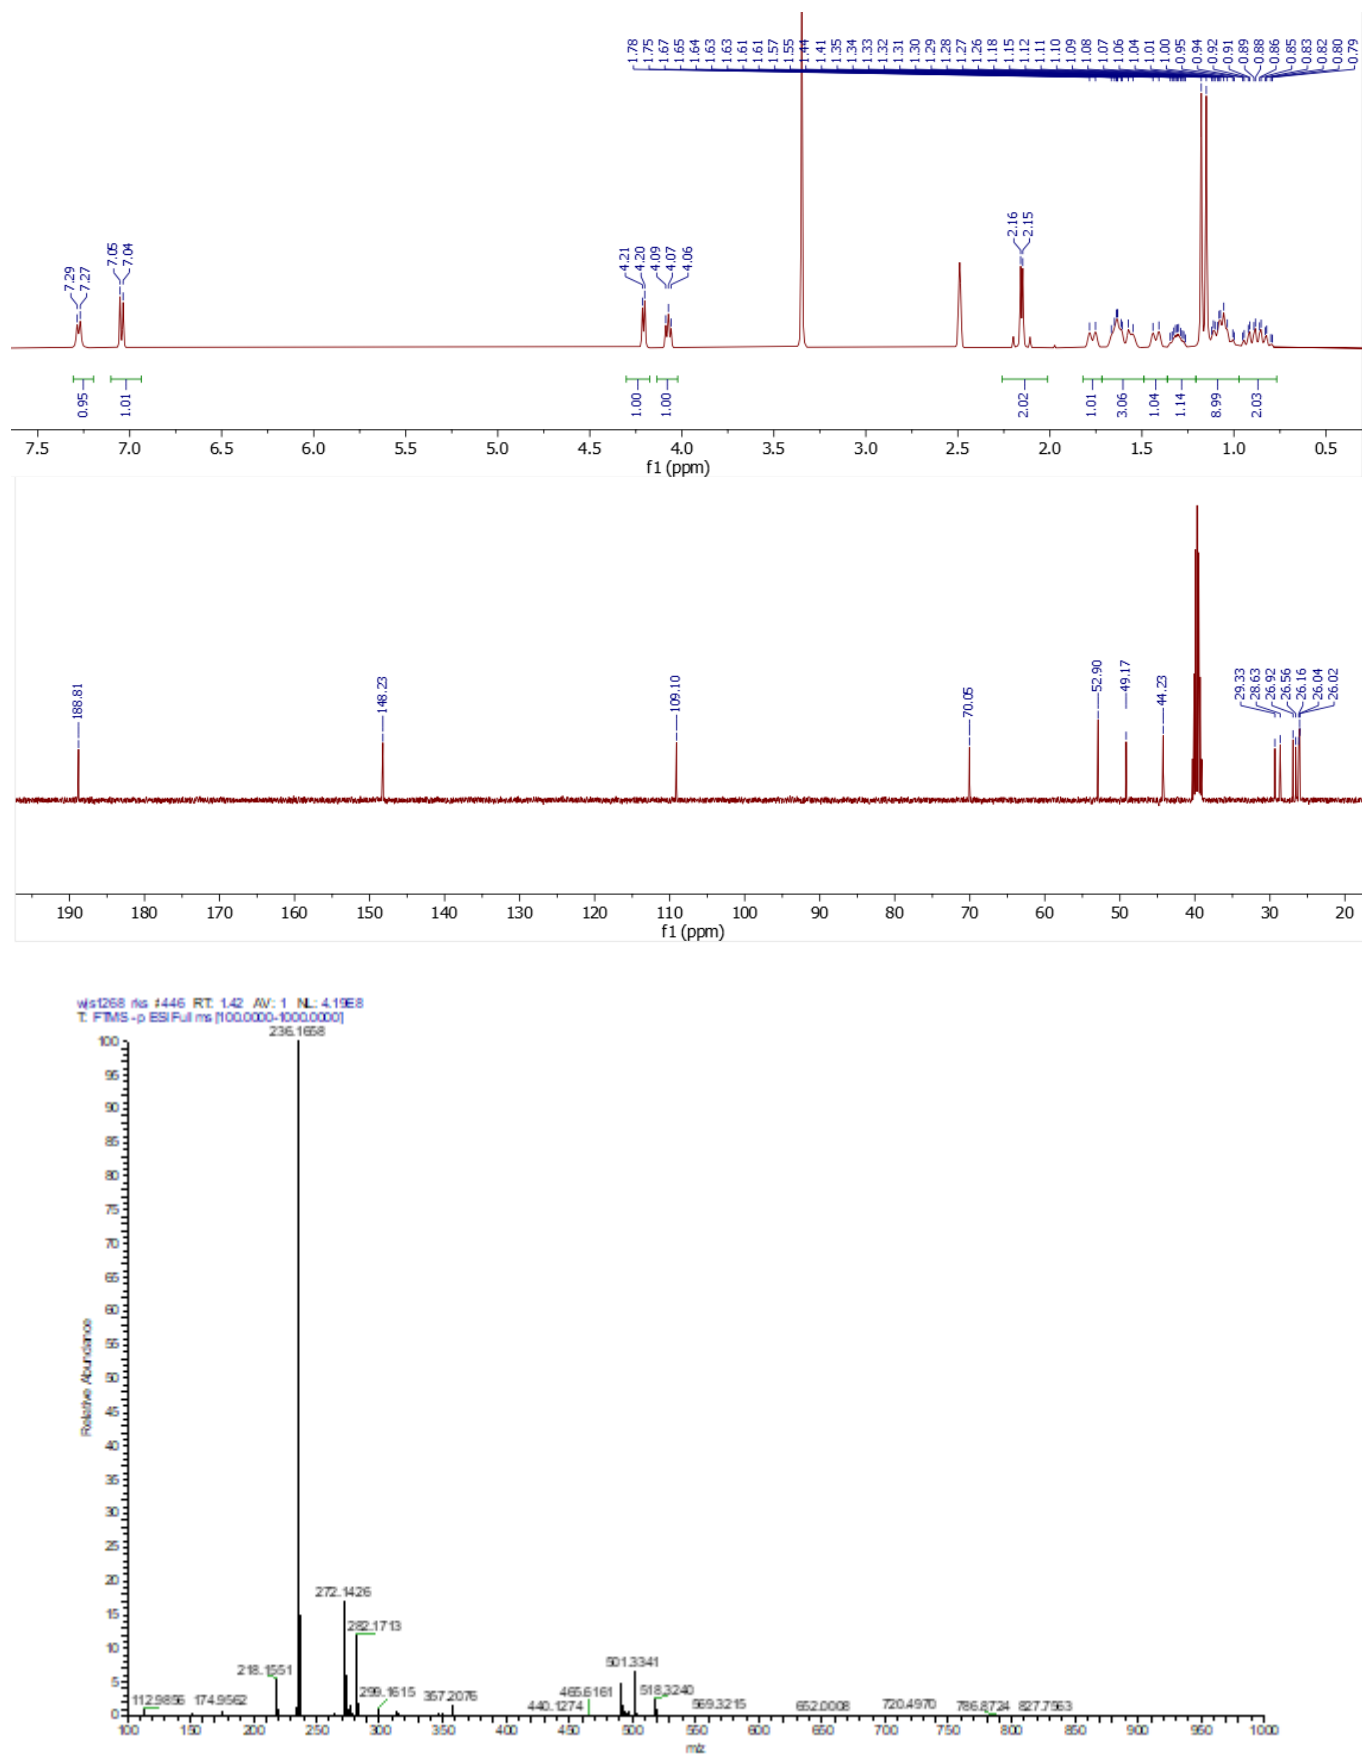

**Figure S19.**  $^1\text{H}$  NMR at 400 MHz,  $^{13}\text{C}$  NMR at 100 MHz spectra, and MS spectra for compound **12**

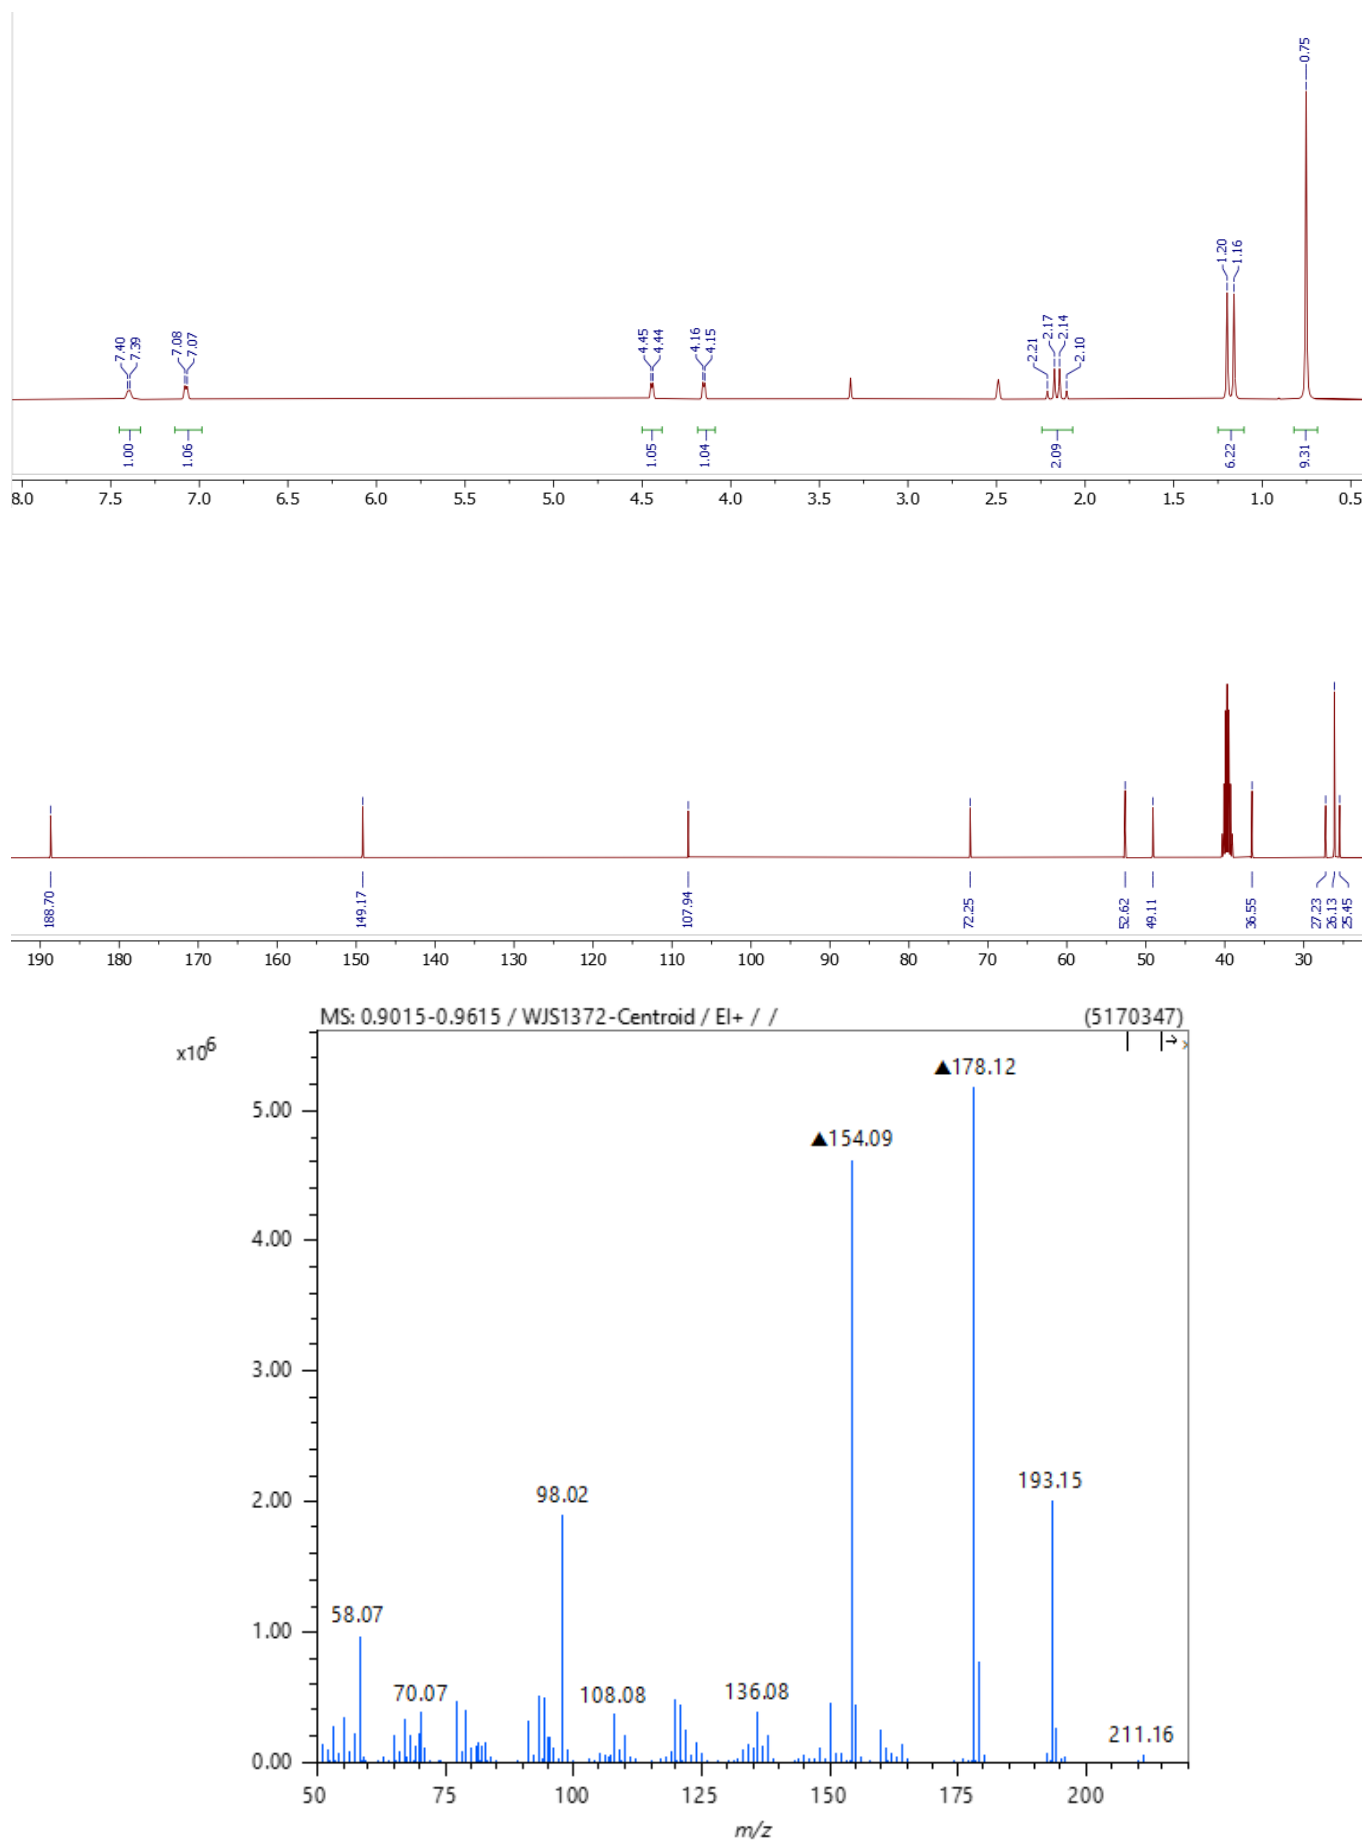

**Figure S20.**  $^1\text{H}$  NMR at 400 MHz,  $^{13}\text{C}$  NMR at 100 MHz spectra, and MS spectra for compound 13

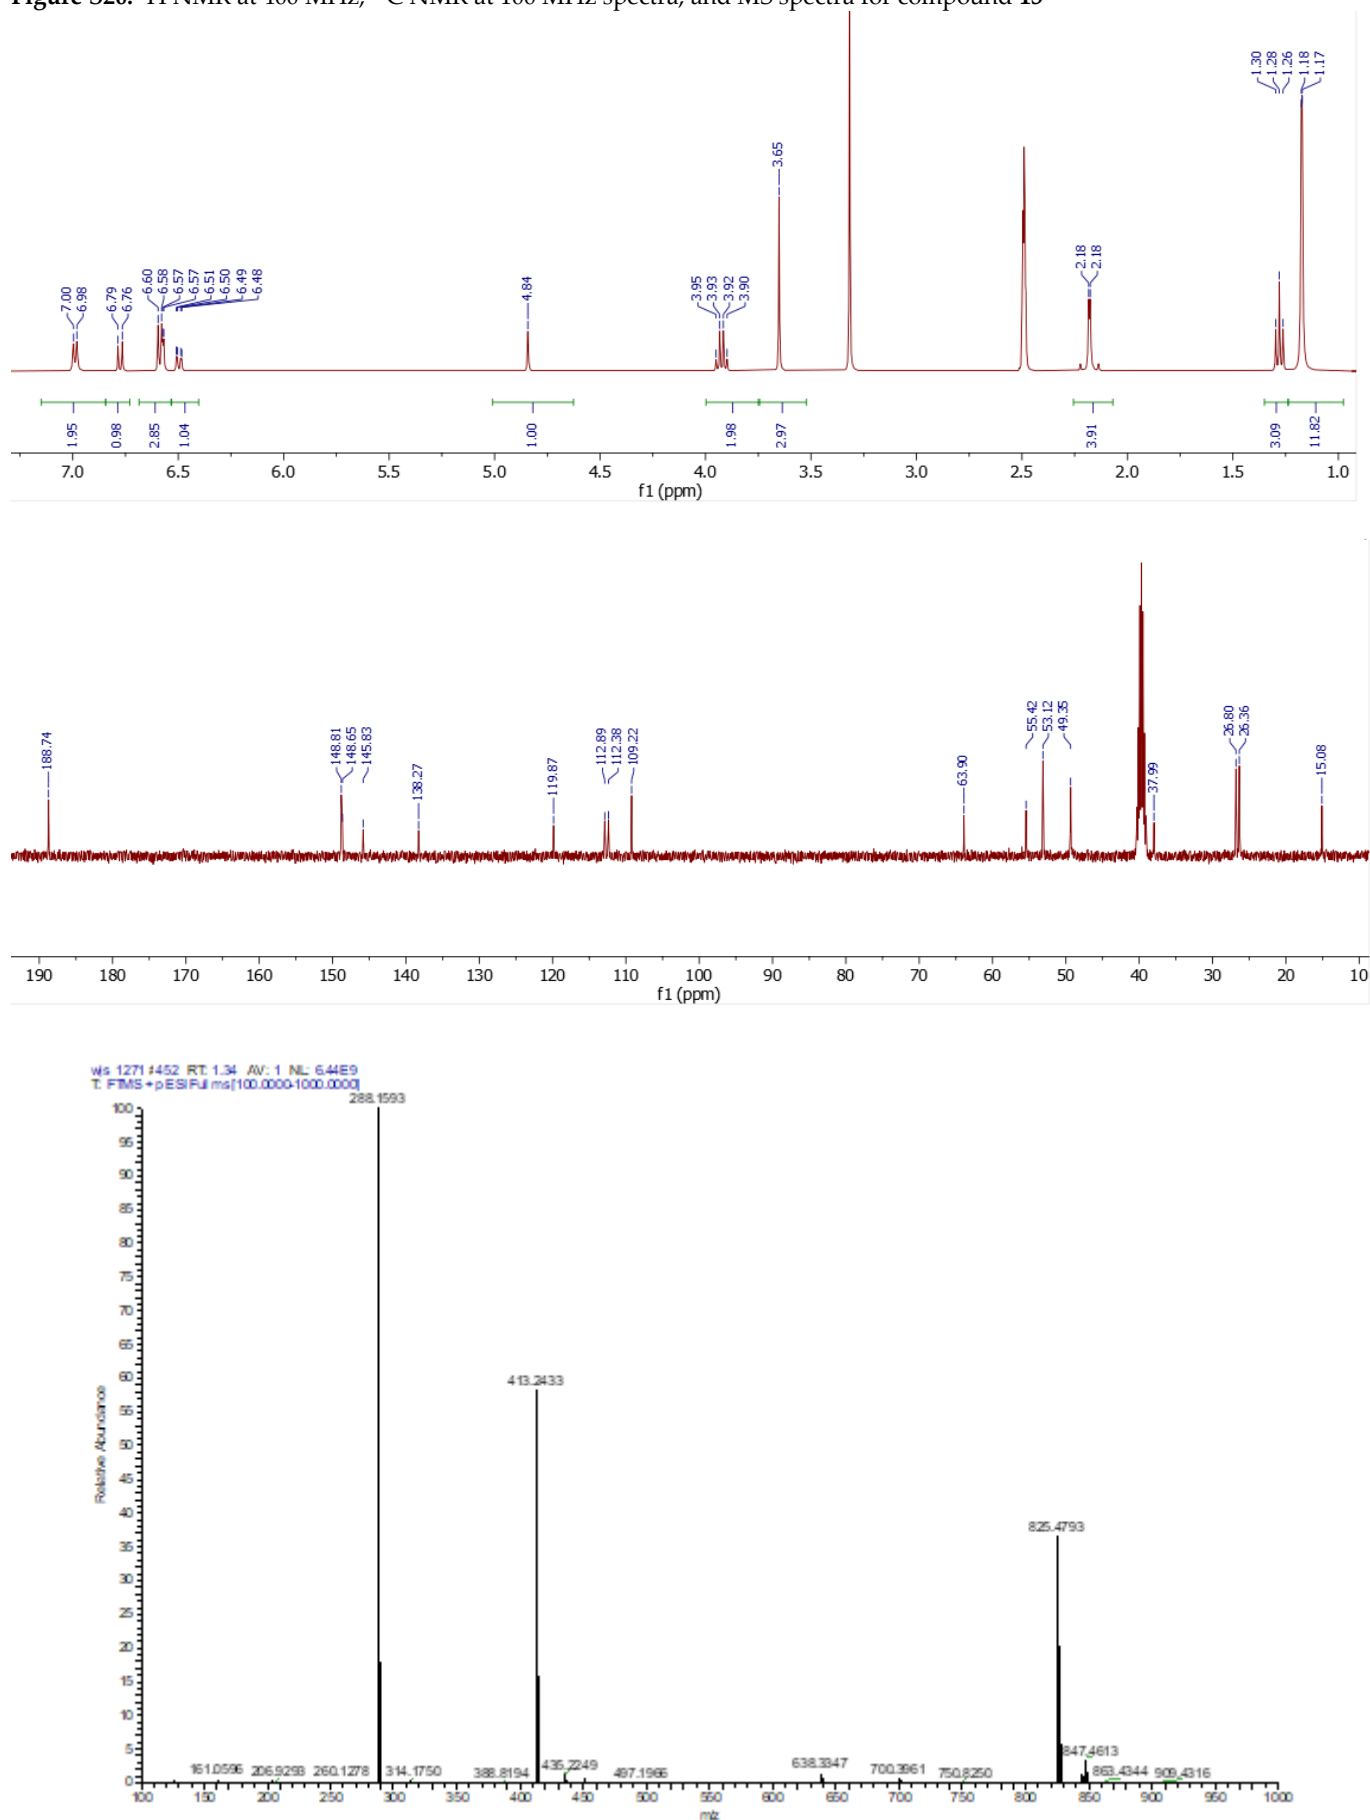



**Figure S21.**  $^1\text{H}$  NMR at 400 MHz,  $^{13}\text{C}$  NMR at 100 MHz spectra, and MS spectra for compound **14**

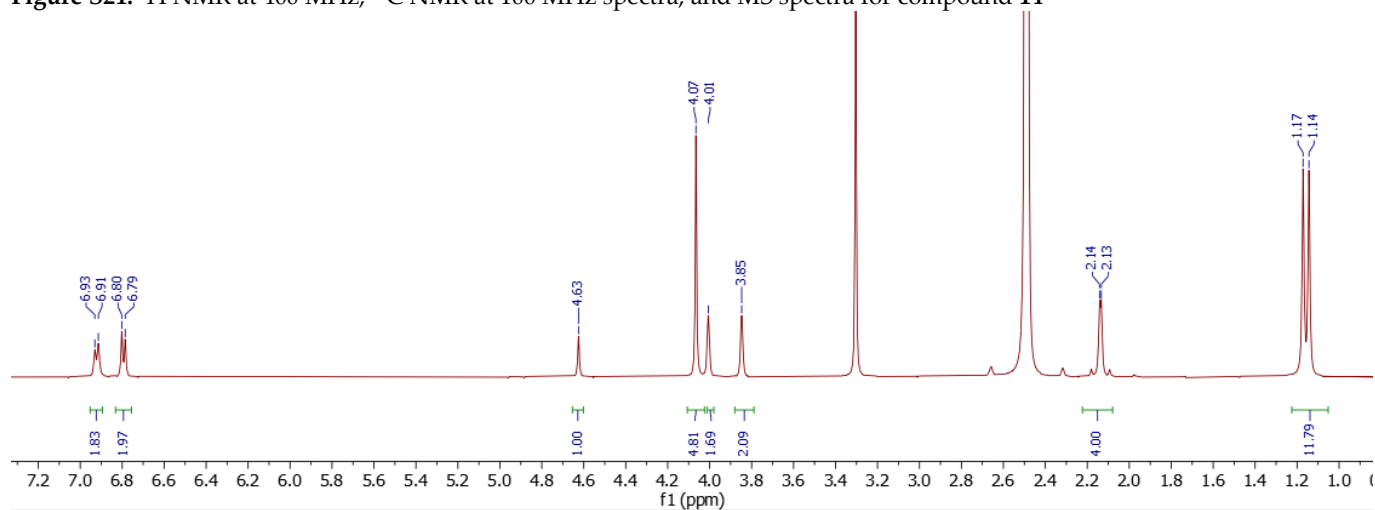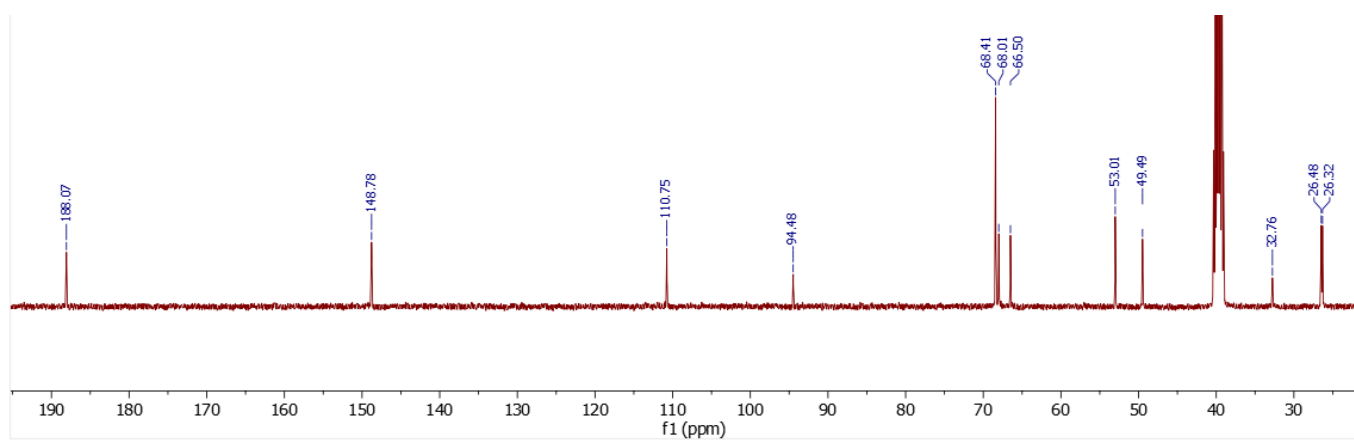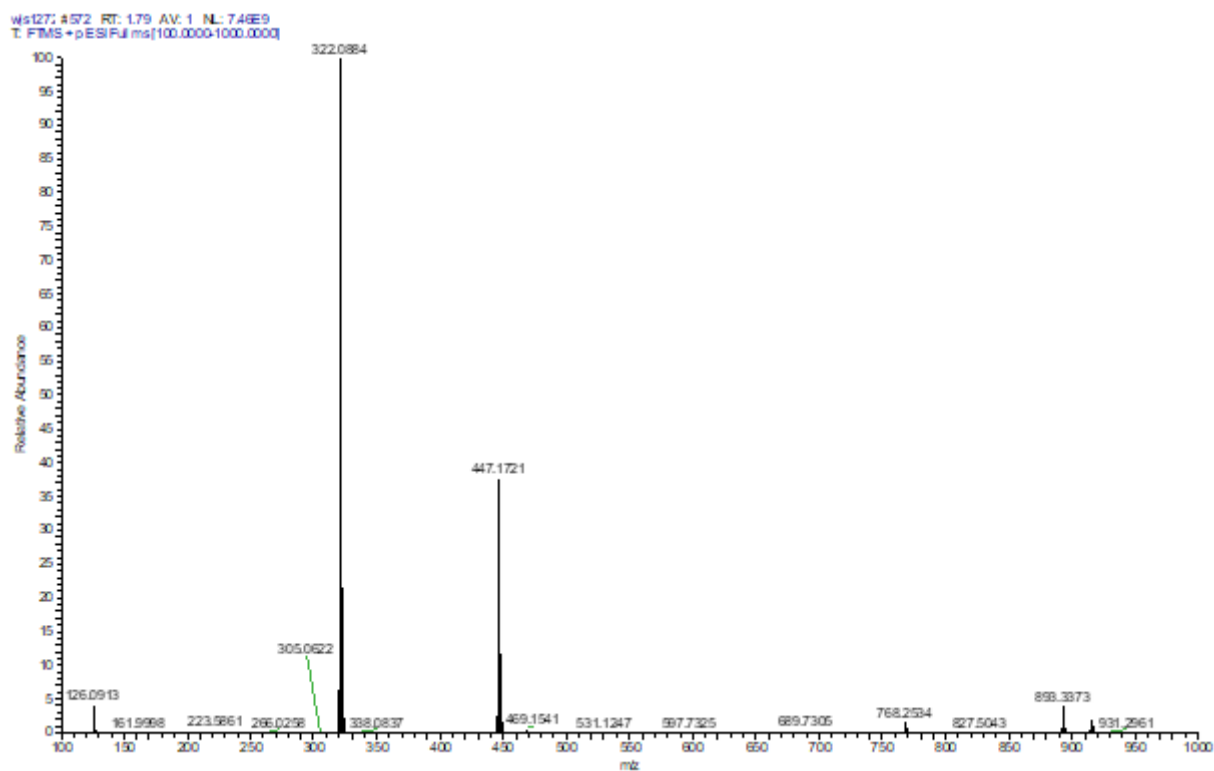

**Table 1.** Crystal data and structure refinement for **6a**.

## Crystal data

|                                     |                                                            |
|-------------------------------------|------------------------------------------------------------|
| Identification code                 | WJS1268                                                    |
| Empirical formula                   | C <sub>18</sub> H <sub>30</sub> N <sub>2</sub> O           |
| Formula weight                      | 290.44                                                     |
| Crystal description                 | block, colourless                                          |
| Crystal size                        | 0.23 x 0.15 x 0.13mm                                       |
| Crystal system, space group         | orthorhombic, P b c a                                      |
| Unit cell dimensions:               | a 10.5346(4)Å                                              |
| b                                   | 11.7374(4)Å                                                |
| c                                   | 28.1853(11)Å                                               |
| Volume                              | 3485.1(2)Å <sup>3</sup>                                    |
| Z                                   | 8                                                          |
| Calculated density                  | 1.107Mg/m <sup>3</sup>                                     |
| F(000)                              | 1280                                                       |
| Linear absorption coefficient $\mu$ | 0.068mm <sup>-1</sup>                                      |
| Absorption correction               | semi-empirical from equivalents                            |
| Max. and min. transmission          | 0.746 and 0.589                                            |
| Unit cell determination             | 2.41° < $\Theta$ < 29.91°<br>9745 reflections used at 100K |

## Data collection

|                                       |                                 |
|---------------------------------------|---------------------------------|
| Temperature                           | 100K                            |
| Diffractometer                        | Bruker APEX-II CCD              |
| Radiation source                      | Incoatec microfocus sealed tube |
| Radiation and wavelength              | MoK $\alpha$ , 0.71073Å         |
| Monochromator                         | multilayer monochromator        |
| Scan type                             | $\phi$ and $\omega$ scans       |
| $\Theta$ range for data collection    | 2.41 to 30.00°                  |
| Reflections collected / unique        | 125061 / 5084                   |
| Significant unique reflections        | 4213 with $I > 2\sigma(I)$      |
| R(int), R(sigma)                      | 0.0642, 0.0247                  |
| Completeness to $\Theta = 30.0^\circ$ | 99.9%                           |

## Refinement

|                                       |                                                                        |
|---------------------------------------|------------------------------------------------------------------------|
| Refinement method                     | Full-matrix least-squares on $F^2$                                     |
| Data / parameters / restraints        | 5084 / 211 / 1                                                         |
| Goodness-of-fit on $F^2$              | 1.035                                                                  |
| Final R indices [ $I > 2\sigma(I)$ ]  | R1 = 0.0431, wR2 = 0.1082                                              |
| R indices (all data)                  | R1 = 0.0545, wR2 = 0.1167                                              |
| Extinction expression                 | none                                                                   |
| Weighting scheme                      | $w = 1/[\sigma^2(F_o^2) + (aP)^2 + bP]$ where $P = (F_o^2 + 2F_c^2)/3$ |
| Weighting scheme parameters a, b      | 0.0543, 1.4314                                                         |
| Largest $\Delta/\sigma$ in last cycle | 0.001                                                                  |
| Largest difference peak and hole      | 0.417 and -0.219e/Å <sup>3</sup>                                       |
| Structure Solution Program            | SHELXS-97 (Sheldrick, 2008)                                            |
| Structure Refinement Program          | SHELXL-2014/6 (Sheldrick, 2015)                                        |

**Table 2.** Selected bond lengths [Å] and angles [°] for **6a**.

|             |            |
|-------------|------------|
| N1-C2       | 1.4682(12) |
| N1-C6       | 1.3332(12) |
| C2-C3       | 1.5295(13) |
| C3-C4       | 1.5246(13) |
| C4-O4       | 1.2458(11) |
| C4-C5       | 1.4258(12) |
| C5-C6       | 1.3780(12) |
| C5-C9       | 1.5151(12) |
| C9-N11      | 1.4782(12) |
| N11-C12     | 1.4682(12) |
| N11-C15     | 1.4711(12) |
| C2-N1-C6    | 120.23(8)  |
| C2-N1-H1    | 120.5(4)   |
| C6-N1-H1    | 117.6(5)   |
| O4-C4-C5    | 123.97(8)  |
| O4-C4-C3    | 119.92(8)  |
| C5-C4-C3    | 115.93(8)  |
| C6-C5-C4    | 118.29(8)  |
| C6-C5-C9    | 120.68(8)  |
| C4-C5-C9    | 120.94(8)  |
| C12-N11-C15 | 103.35(8)  |
| C12-N11-C9  | 114.00(8)  |
| C15-N11-C9  | 111.11(7)  |
| O4-C4-C5-C6 | 178.86(8)  |
| C3-C4-C5-C6 | 3.78(12)   |
| O4-C4-C5-C9 | 2.21(13)   |
| C3-C4-C5-C9 | -172.87(8) |
| C4-C5-C6-N1 | 9.01(14)   |
| C9-C5-C6-N1 | -174.33(8) |

**Table 3.** Hydrogen bond for **6a** [Å, °].

| D-H...A                  | d(D-H) | d(H...A)   | d(D...A)   | <(DHA)   |
|--------------------------|--------|------------|------------|----------|
| N1-H1...O4 <sup>i)</sup> | 0.88   | 1.9071(16) | 2.7754(10) | 168.7(6) |

Symmetry transformations used to generate equivalent atoms:

<sup>i)</sup> 3/2-x, y-1/2, z

**Table 4.** Atomic coordinates and equivalent isotropic displacement parameters ( $\text{\AA}^2$ ) for **6a**.  $U_{\text{eq}}$  is defined as one third of the trace of the orthogonalized  $U_{ij}$  tensor.

|     | x           | y           | z          | $U_{\text{eq}}$ |
|-----|-------------|-------------|------------|-----------------|
| N1  | 0.80786(8)  | 0.59527(7)  | 0.57590(3) | 0.01582(17)     |
| C2  | 0.87110(9)  | 0.70462(8)  | 0.56689(3) | 0.01519(18)     |
| C3  | 0.77025(9)  | 0.78680(8)  | 0.54810(3) | 0.01419(18)     |
| C4  | 0.64934(8)  | 0.79051(8)  | 0.57779(3) | 0.01204(17)     |
| O4  | 0.58493(6)  | 0.87944(6)  | 0.57938(2) | 0.01720(15)     |
| C5  | 0.61254(8)  | 0.68579(7)  | 0.59943(3) | 0.01195(17)     |
| C6  | 0.69135(9)  | 0.59289(8)  | 0.59435(3) | 0.01350(17)     |
| C7  | 0.97509(10) | 0.68505(10) | 0.53006(4) | 0.0244(2)       |
| C8  | 0.92818(10) | 0.74893(10) | 0.61347(4) | 0.0217(2)       |
| C9  | 0.48665(8)  | 0.67494(8)  | 0.62502(3) | 0.01250(17)     |
| N11 | 0.42549(7)  | 0.56605(7)  | 0.61192(3) | 0.01451(16)     |
| C12 | 0.30326(9)  | 0.54614(10) | 0.63555(4) | 0.0231(2)       |
| C13 | 0.24392(11) | 0.44916(10) | 0.60675(5) | 0.0303(3)       |
| C14 | 0.29471(10) | 0.46833(10) | 0.55600(4) | 0.0271(2)       |
| C15 | 0.39252(10) | 0.56394(9)  | 0.56121(4) | 0.0223(2)       |
| C21 | 0.50148(9)  | 0.68812(9)  | 0.67934(3) | 0.01639(19)     |
| C22 | 0.58155(10) | 0.59488(10) | 0.70246(4) | 0.0222(2)       |
| C23 | 0.58787(13) | 0.61102(12) | 0.75640(4) | 0.0332(3)       |
| C24 | 0.64059(12) | 0.72816(12) | 0.76873(4) | 0.0321(3)       |
| C25 | 0.56294(12) | 0.82213(11) | 0.74576(4) | 0.0299(3)       |
| C26 | 0.55433(11) | 0.80582(9)  | 0.69198(4) | 0.0219(2)       |

**Table 5.** Hydrogen coordinates and isotropic displacement parameters ( $\text{\AA}^2$ ) for **6a**.

|      | x         | y         | z         | U <sub>iso</sub> |
|------|-----------|-----------|-----------|------------------|
| H1   | 0.8516(5) | 0.5314(3) | 0.5760(5) | 0.028(4)         |
| H31  | 0.8070    | 0.8644    | 0.5468    | 0.025(2)         |
| H32  | 0.7478    | 0.7644    | 0.5153    | 0.025(2)         |
| H6   | 0.6601    | 0.5213    | 0.6048    | 0.017(3)         |
| H71  | 1.0374    | 0.6308    | 0.5426    | 0.034(2)         |
| H72  | 1.0173    | 0.7575    | 0.5230    | 0.034(2)         |
| H73  | 0.9374    | 0.6543    | 0.5010    | 0.034(2)         |
| H81  | 0.8607    | 0.7579    | 0.6371    | 0.033(2)         |
| H82  | 0.9690    | 0.8227    | 0.6079    | 0.033(2)         |
| H83  | 0.9913    | 0.6945    | 0.6252    | 0.033(2)         |
| H9   | 0.4306    | 0.7380    | 0.6137    | 0.017(3)         |
| H121 | 0.2494    | 0.6152    | 0.6345    | 0.031(3)         |
| H122 | 0.3158    | 0.5234    | 0.6690    | 0.031(3)         |
| H131 | 0.1501    | 0.4536    | 0.6075    | 0.046(3)         |
| H132 | 0.2708    | 0.3740    | 0.6192    | 0.046(3)         |
| H141 | 0.3349    | 0.3982    | 0.5435    | 0.041(3)         |
| H142 | 0.2254    | 0.4914    | 0.5343    | 0.041(3)         |
| H151 | 0.4686    | 0.5480    | 0.5417    | 0.037(3)         |
| H152 | 0.3559    | 0.6378    | 0.5512    | 0.037(3)         |
| H21  | 0.4145    | 0.6831    | 0.6934    | 0.024(3)         |
| H221 | 0.6685    | 0.5968    | 0.6891    | 0.028(2)         |
| H222 | 0.5442    | 0.5195    | 0.6952    | 0.028(2)         |
| H231 | 0.5018    | 0.6027    | 0.7701    | 0.044(3)         |
| H232 | 0.6428    | 0.5514    | 0.7704    | 0.044(3)         |
| H241 | 0.6398    | 0.7383    | 0.8036    | 0.038(3)         |
| H242 | 0.7297    | 0.7335    | 0.7578    | 0.038(3)         |
| H251 | 0.6025    | 0.8968    | 0.7527    | 0.041(3)         |
| H252 | 0.4764    | 0.8223    | 0.7595    | 0.041(3)         |
| H261 | 0.6398    | 0.8146    | 0.6779    | 0.029(3)         |
| H262 | 0.4987    | 0.8654    | 0.6783    | 0.029(3)         |

**Table 6.** Anisotropic displacement parameters ( $\text{\AA}^2$ ) for **6a**. The anisotropic displacement factor exponent takes the form:  $-2\pi^2[h^2 a^{*2}U_{11} + \dots + 2 h k a^* b^* U_{12}]$ .

|     | U <sub>11</sub> | U <sub>22</sub> | U <sub>33</sub> | U <sub>23</sub> | U <sub>13</sub> | U <sub>12</sub> |
|-----|-----------------|-----------------|-----------------|-----------------|-----------------|-----------------|
| N1  | 0.0144(4)       | 0.0108(4)       | 0.0223(4)       | 0.0003(3)       | 0.0049(3)       | 0.0023(3)       |
| C2  | 0.0124(4)       | 0.0142(4)       | 0.0190(4)       | -0.0002(3)      | 0.0030(3)       | -0.0010(3)      |
| C3  | 0.0143(4)       | 0.0128(4)       | 0.0154(4)       | 0.0011(3)       | 0.0014(3)       | -0.0024(3)      |
| C4  | 0.0118(4)       | 0.0113(4)       | 0.0130(4)       | -0.0006(3)      | -0.0019(3)      | -0.0015(3)      |
| O4  | 0.0162(3)       | 0.0106(3)       | 0.0248(3)       | 0.0012(3)       | -0.0019(3)      | 0.0005(3)       |
| C5  | 0.0119(4)       | 0.0110(4)       | 0.0129(4)       | 0.0001(3)       | 0.0011(3)       | -0.0005(3)      |
| C6  | 0.0149(4)       | 0.0104(4)       | 0.0153(4)       | 0.0006(3)       | 0.0021(3)       | -0.0009(3)      |
| C7  | 0.0179(5)       | 0.0249(5)       | 0.0306(5)       | -0.0012(4)      | 0.0111(4)       | -0.0012(4)      |
| C8  | 0.0163(4)       | 0.0252(5)       | 0.0236(5)       | -0.0018(4)      | -0.0043(4)      | -0.0003(4)      |
| C9  | 0.0106(4)       | 0.0123(4)       | 0.0146(4)       | -0.0001(3)      | 0.0009(3)       | -0.0001(3)      |
| N11 | 0.0113(3)       | 0.0151(4)       | 0.0172(4)       | 0.0006(3)       | 0.0002(3)       | -0.0035(3)      |
| C12 | 0.0130(4)       | 0.0290(5)       | 0.0272(5)       | 0.0039(4)       | 0.0028(4)       | -0.0056(4)      |
| C13 | 0.0183(5)       | 0.0260(6)       | 0.0465(7)       | 0.0038(5)       | -0.0044(5)      | -0.0095(4)      |
| C14 | 0.0192(5)       | 0.0236(5)       | 0.0384(6)       | -0.0101(5)      | -0.0066(4)      | -0.0030(4)      |
| C15 | 0.0245(5)       | 0.0244(5)       | 0.0181(4)       | -0.0019(4)      | -0.0039(4)      | -0.0082(4)      |
| C21 | 0.0132(4)       | 0.0225(5)       | 0.0134(4)       | -0.0020(3)      | 0.0018(3)       | 0.0005(3)       |
| C22 | 0.0254(5)       | 0.0249(5)       | 0.0162(4)       | 0.0048(4)       | -0.0016(4)      | -0.0008(4)      |
| C23 | 0.0396(7)       | 0.0440(7)       | 0.0162(5)       | 0.0074(5)       | -0.0044(4)      | -0.0046(6)      |
| C24 | 0.0312(6)       | 0.0486(8)       | 0.0165(5)       | -0.0028(5)      | -0.0050(4)      | -0.0022(5)      |
| C25 | 0.0282(6)       | 0.0407(7)       | 0.0209(5)       | -0.0132(5)      | -0.0023(4)      | 0.0027(5)       |
| C26 | 0.0243(5)       | 0.0225(5)       | 0.0191(4)       | -0.0063(4)      | -0.0034(4)      | 0.0038(4)       |

**Table 7.** Full list of bond lengths [Å] and angles [°] for **6a**.

|          |            |             |           |
|----------|------------|-------------|-----------|
| N1-C2    | 1.4682(12) | C25-H251    | 0.99      |
| N1-C6    | 1.3332(12) | C25-H252    | 0.99      |
| N1-H1    | 0.88       | C26-H261    | 0.99      |
| C2-C3    | 1.5295(13) | C26-H262    | 0.99      |
| C2-C7    | 1.5266(13) |             |           |
| C2-C8    | 1.5350(14) | C2-N1-C6    | 120.23(8) |
| C3-C4    | 1.5246(13) | C2-N1-H1    | 120.5(4)  |
| C3-H31   | 0.99       | C6-N1-H1    | 117.6(5)  |
| C3-H32   | 0.99       | N1-C2-C7    | 108.17(8) |
| C4-O4    | 1.2458(11) | N1-C2-C3    | 107.22(7) |
| C4-C5    | 1.4258(12) | C7-C2-C3    | 110.97(8) |
| C5-C6    | 1.3780(12) | N1-C2-C8    | 109.02(8) |
| C5-C9    | 1.5151(12) | C7-C2-C8    | 110.58(8) |
| C6-H6    | 0.95       | C3-C2-C8    | 110.77(8) |
| C7-H71   | 0.98       | C4-C3-C2    | 114.10(7) |
| C7-H72   | 0.98       | C4-C3-H31   | 108.7     |
| C7-H73   | 0.98       | C2-C3-H31   | 108.7     |
| C8-H81   | 0.98       | C4-C3-H32   | 108.7     |
| C8-H82   | 0.98       | C2-C3-H32   | 108.7     |
| C8-H83   | 0.98       | H31-C3-H32  | 107.6     |
| C9-N11   | 1.4782(12) | O4-C4-C5    | 123.97(8) |
| C9-C21   | 1.5467(12) | O4-C4-C3    | 119.92(8) |
| C9-H9    | 1.00       | C5-C4-C3    | 115.93(8) |
| N11-C12  | 1.4682(12) | C6-C5-C4    | 118.29(8) |
| N11-C15  | 1.4711(12) | C6-C5-C9    | 120.68(8) |
| C12-C13  | 1.5314(16) | C4-C5-C9    | 120.94(8) |
| C12-H121 | 0.99       | N1-C6-C5    | 125.35(8) |
| C12-H122 | 0.99       | N1-C6-H6    | 117.3     |
| C13-C14  | 1.5436(18) | C5-C6-H6    | 117.3     |
| C13-H131 | 0.99       | C2-C7-H71   | 109.5     |
| C13-H132 | 0.99       | C2-C7-H72   | 109.5     |
| C14-C15  | 1.5306(15) | H71-C7-H72  | 109.5     |
| C14-H141 | 0.99       | C2-C7-H73   | 109.5     |
| C14-H142 | 0.99       | H71-C7-H73  | 109.5     |
| C15-H151 | 0.99       | H72-C7-H73  | 109.5     |
| C15-H152 | 0.99       | C2-C8-H81   | 109.5     |
| C21-C22  | 1.5278(14) | C2-C8-H82   | 109.5     |
| C21-C26  | 1.5315(14) | H81-C8-H82  | 109.5     |
| C21-H21  | 1.00       | C2-C8-H83   | 109.5     |
| C22-C23  | 1.5335(15) | H81-C8-H83  | 109.5     |
| C22-H221 | 0.99       | H82-C8-H83  | 109.5     |
| C22-H222 | 0.99       | N11-C9-C5   | 109.59(7) |
| C23-C24  | 1.5229(19) | N11-C9-C21  | 112.20(7) |
| C23-H231 | 0.99       | C5-C9-C21   | 112.00(7) |
| C23-H232 | 0.99       | N11-C9-H9   | 107.6     |
| C24-C25  | 1.5182(18) | C5-C9-H9    | 107.6     |
| C24-H241 | 0.99       | C21-C9-H9   | 107.6     |
| C24-H242 | 0.99       | C12-N11-C15 | 103.35(8) |
| C25-C26  | 1.5305(15) | C12-N11-C9  | 114.00(8) |

|               |            |
|---------------|------------|
| C15-N11-C9    | 111.11(7)  |
| N11-C12-C13   | 103.65(9)  |
| N11-C12-H121  | 111.0      |
| C13-C12-H121  | 111.0      |
| N11-C12-H122  | 111.0      |
| C13-C12-H122  | 111.0      |
| H121-C12-H122 | 109.0      |
| C12-C13-C14   | 103.96(9)  |
| C12-C13-H131  | 111.0      |
| C14-C13-H131  | 111.0      |
| C12-C13-H132  | 111.0      |
| C14-C13-H132  | 111.0      |
| H131-C13-H132 | 109.0      |
| C15-C14-C13   | 104.56(9)  |
| C15-C14-H141  | 110.8      |
| C13-C14-H141  | 110.8      |
| C15-C14-H142  | 110.8      |
| C13-C14-H142  | 110.8      |
| H141-C14-H142 | 108.9      |
| N11-C15-C14   | 105.34(8)  |
| N11-C15-H151  | 110.7      |
| C14-C15-H151  | 110.7      |
| N11-C15-H152  | 110.7      |
| C14-C15-H152  | 110.7      |
| H151-C15-H152 | 108.8      |
| C22-C21-C26   | 110.26(8)  |
| C22-C21-C9    | 113.97(8)  |
| C26-C21-C9    | 110.93(8)  |
| C22-C21-H21   | 107.1      |
| C26-C21-H21   | 107.1      |
| C9-C21-H21    | 107.1      |
| C21-C22-C23   | 111.00(9)  |
| C21-C22-H221  | 109.4      |
| C23-C22-H221  | 109.4      |
| C21-C22-H222  | 109.4      |
| C23-C22-H222  | 109.4      |
| H221-C22-H222 | 108.0      |
| C24-C23-C22   | 110.71(10) |
| C24-C23-H231  | 109.5      |
| C22-C23-H231  | 109.5      |
| C24-C23-H232  | 109.5      |
| C22-C23-H232  | 109.5      |
| H231-C23-H232 | 108.1      |
| C25-C24-C23   | 111.23(10) |
| C25-C24-H241  | 109.4      |
| C23-C24-H241  | 109.4      |
| C25-C24-H242  | 109.4      |
| C23-C24-H242  | 109.4      |
| H241-C24-H242 | 108.0      |
| C24-C25-C26   | 111.31(9)  |
| C24-C25-H251  | 109.4      |

|                 |            |
|-----------------|------------|
| C26-C25-H251    | 109.4      |
| C24-C25-H252    | 109.4      |
| C26-C25-H252    | 109.4      |
| H251-C25-H252   | 108.0      |
| C25-C26-C21     | 111.39(9)  |
| C25-C26-H261    | 109.3      |
| C21-C26-H261    | 109.3      |
| C25-C26-H262    | 109.3      |
| C21-C26-H262    | 109.3      |
| H261-C26-H262   | 108.0      |
| C6-N1-C2-C7     | -158.85(9) |
| C6-N1-C2-C3     | -39.11(11) |
| C6-N1-C2-C8     | 80.85(11)  |
| N1-C2-C3-C4     | 49.19(10)  |
| C7-C2-C3-C4     | 167.11(8)  |
| C8-C2-C3-C4     | -69.66(10) |
| C2-C3-C4-O4     | 150.80(8)  |
| C2-C3-C4-C5     | -33.91(11) |
| O4-C4-C5-C6     | 178.86(8)  |
| C3-C4-C5-C6     | 3.78(12)   |
| O4-C4-C5-C9     | 2.21(13)   |
| C3-C4-C5-C9     | -172.87(8) |
| C2-N1-C6-C5     | 11.00(14)  |
| C4-C5-C6-N1     | 9.01(14)   |
| C9-C5-C6-N1     | -174.33(8) |
| C6-C5-C9-N11    | -40.22(11) |
| C4-C5-C9-N11    | 136.35(8)  |
| C6-C5-C9-C21    | 84.97(10)  |
| C4-C5-C9-C21    | -98.46(10) |
| C5-C9-N11-C12   | 179.01(8)  |
| C21-C9-N11-C12  | 53.93(10)  |
| C5-C9-N11-C15   | -64.71(10) |
| C21-C9-N11-C15  | 170.21(8)  |
| C15-N11-C12-C13 | 44.16(10)  |
| C9-N11-C12-C13  | 164.88(8)  |
| N11-C12-C13-C14 | -31.48(11) |
| C12-C13-C14-C15 | 7.50(12)   |
| C12-N11-C15-C14 | -39.44(11) |
| C9-N11-C15-C14  | -162.10(8) |
| C13-C14-C15-N11 | 19.02(11)  |
| N11-C9-C21-C22  | 59.79(10)  |
| C5-C9-C21-C22   | -63.95(10) |
| N11-C9-C21-C26  | -175.05(8) |
| C5-C9-C21-C26   | 61.21(10)  |
| C26-C21-C22-C23 | 56.61(11)  |
| C9-C21-C22-C23  | -177.88(9) |
| C21-C22-C23-C24 | -57.07(13) |
| C22-C23-C24-C25 | 56.25(14)  |
| C23-C24-C25-C26 | -55.48(13) |
| C24-C25-C26-C21 | 55.38(13)  |



|                 |            |
|-----------------|------------|
| C22-C21-C26-C25 | -55.73(11) |
| C9-C21-C26-C25  | 177.05(8)  |
